# Supplementary material
Source: bioRxiv or medRxiv preprint supplement (http://medrxiv.stage.highwire.org/highwire/filestream/94086/field_highwire_adjunct_files/1/2020.08.21.20179374-2.pdf)
Supplement: Supplementary file [file 2020.08.21.20179374-2.pdf]

## Supplementary Figures Contents

**Figure S1:** Flowchart of the steps taken to define DSM-V-like Generalized Anxiety Disorder (GAD) diagnosis from the specified UK Biobank field IDs, following the DSM-V criteria as outlined in <http://dsm.psychiatryonline.org/doi/full/10.1176/appi.books.9780890425596.dsm05#BABDFBHJ>

**Figure S2:A:** Genome-wide genetic correlations between males and females for six traits. Bars represent standard error estimates. **B:** Genome-wide genetic correlations between traits stratified by females (lower triangle) and males (upper triangle). Asterisks indicate genetic correlations that pass the  $FDR < 5\%$  cutoff. See Table S5 for complete numerical results.

**Figure S3:** Estimates of local genetic covariance between anxiety meta-analysis and other phenotypes. Red indicates genomic regions with significant local genetic covariances. Text identifies the region as chromosome:start bp-end bp.

**Figure S4:** Estimates of local genetic covariance between alcohol dependence and other phenotypes. Red indicates genomic regions with significant local genetic covariances. Text identifies the region as chromosome:start bp-end bp.

**Figure S5:** Estimates of local genetic covariance between AUDIT-C and other phenotypes. Red indicates genomic regions with significant local genetic covariances. Text identifies the region as chromosome:start bp-end bp.

**Figure S6:** Estimates of local genetic covariance between the Anxiety NeuroGenetics Study and other phenotypes. Red indicates genomic regions with significant local genetic covariances. Text identifies the region as chromosome:start bp-end bp.

**Figure S7:** Estimates of local genetic covariance between drinks per week and other phenotypes. Red indicates genomic regions with significant local genetic covariances. Text identifies the region as chromosome:start bp-end bp.

**Figure S8:** Estimates of local genetic covariance between the AUDIT-P and other phenotypes. Red indicates genomic regions with significant local genetic covariances. Text identifies the region as chromosome:start bp-end bp.

**Figure S9:** Estimates of local genetic covariance between the AUDIT-T and other phenotypes. Red indicates genomic regions with significant local genetic covariances. Text identifies the region as chromosome:start bp-end bp.

**Figure S10:** Estimates of genetic covariance in the predicted functional genome. Asterisks indicate significant ( $p_{\text{func}} < 8.93 \times 10^{-4}$ ) covariance estimates.

**Figure S11:** Estimates of genetic covariance in the predicted non-functional genome. Asterisks indicate significant ( $p_{\text{func}} < 8.93 \times 10^{-4}$ ) covariance estimates.

**Figure S12:** Estimates of genetic covariance in immune tissue. Asterisks indicate significant ( $p_{\text{tissue}} < 2.6 \times 10^{-4}$ ) stratified covariance estimates.

**Figure S13:** Estimates of genetic covariance in brain tissue. Asterisks indicate significant ( $p_{\text{tissue}} < 2.6 \times 10^{-4}$ ) stratified covariance estimates.

**Figure S14:** Estimates of genetic covariance in the frontal cortex. Asterisks indicate significant ( $p_{\text{brain}} < 1.37 \times 10^{-4}$ ) stratified covariance estimates.

**Figure S15:** Estimates of correlation of LDSC regression coefficients from the baseline analysis. Asterisks indicated regression coefficient correlation estimates that pass the FDR < 5% cutoff.

**Figure S16:** Baseline regression coefficient correlation between all trait pairs.

**Figure S17:** Plot of cell type- and tissue-specific annotations with enrichment scores that pass the FDR < 5% cutoff. The colors represent the three phenotypic categories of the sets: anxiety disorders (red), PAU (light blue) and alcohol consumption (dark blue).

**Figure S18:** Estimates of correlation of LDSC regression coefficients from the cell type- and tissue-specific analysis. Asterisks indicated regression coefficient correlation estimates that pass the FDR < 5% cutoff.

**Figure S19:** Cell type- and tissue-specific regression coefficients correlation between all trait pairs.

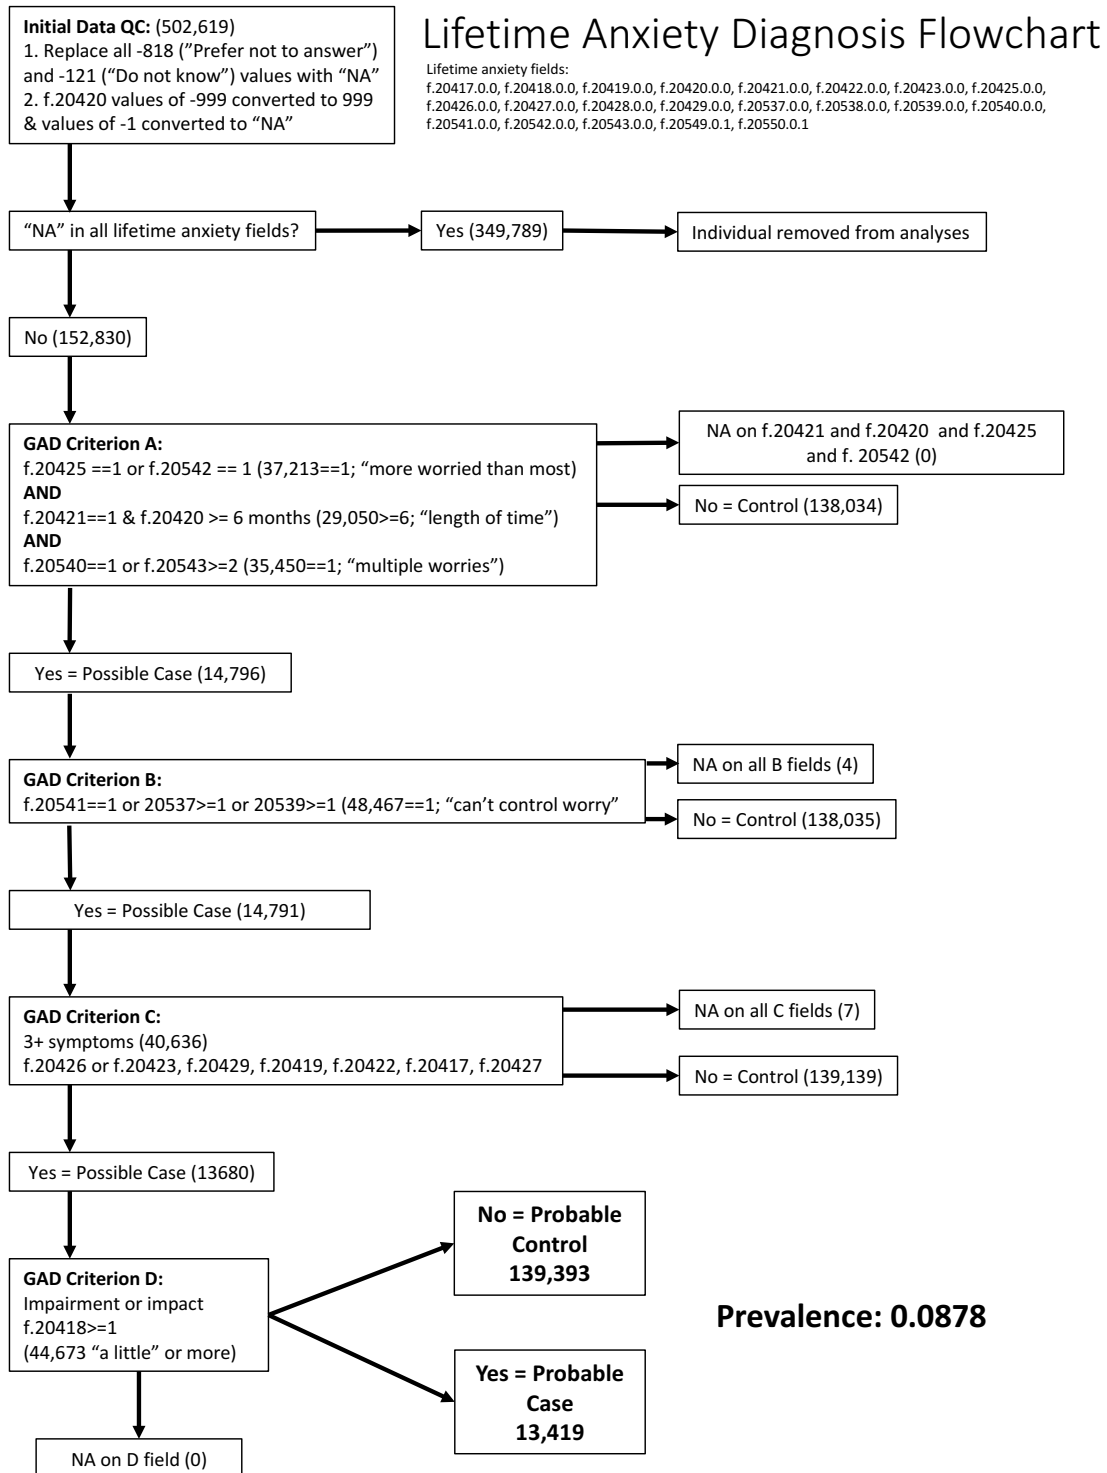

**Figure S1:** Flowchart of the steps taken to define DSM-V-like Generalized Anxiety Disorder (GAD) diagnosis from the specified UK Biobank field IDs, following the DSM-V criteria as outlined in <http://dsm.psychiatryonline.org/doi/full/10.1176/appi.books.9780890425596.dsm05#BABDFBHJ>

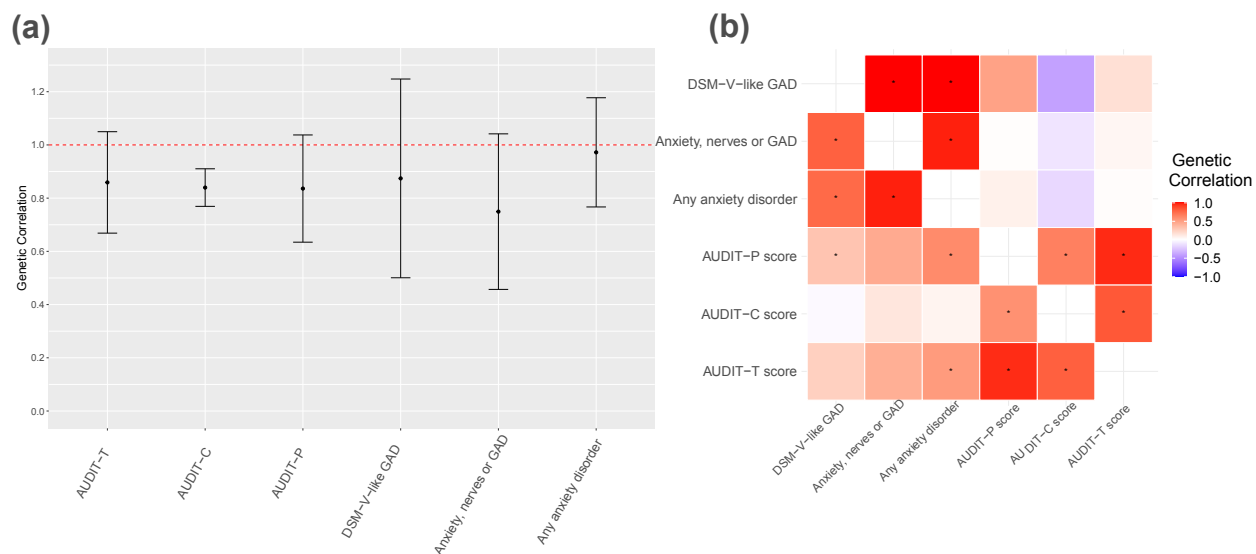

**Figure S2:A:** Genome-wide genetic correlations between males and females for six traits. Bars represent standard error estimates. **B:** Genome-wide genetic correlations between traits stratified by females (lower triangle) and males (upper triangle). Asterisks indicate genetic correlations that pass the FDR < 5% cutoff. See Table S5 for complete numerical results.

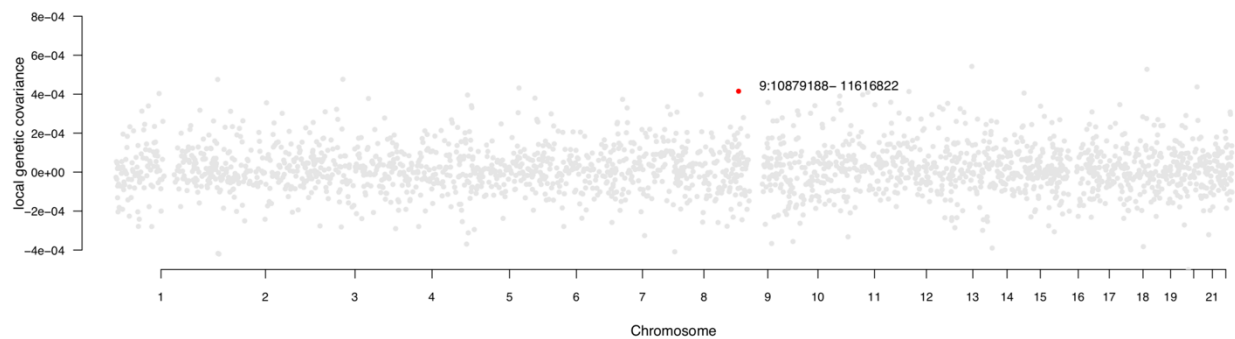

**Figure S3 (a):** Estimates of local genetic covariance between anxiety meta-analysis and alcohol dependence. Red indicates genomic regions with significant local genetic covariances. Text identifies the region as chromosome:start bp-end bp.

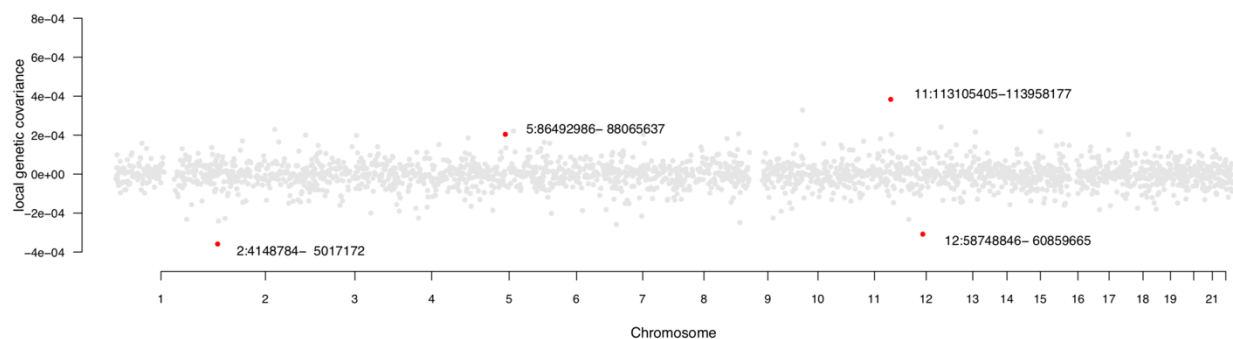

**Figure S3 (b):** Estimates of local genetic covariance between anxiety meta-analysis and AUDIT-C. Red indicates genomic regions with significant local genetic covariances. Text identifies the region as chromosome:start bp-end bp.

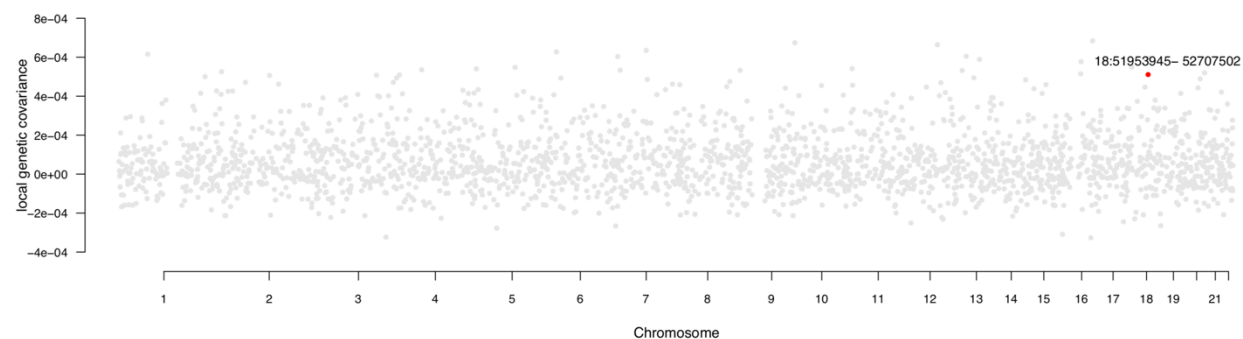

**Figure S3 (c):** Estimates of local genetic covariance between anxiety meta-analysis and Anxiety NeuroGenetics STudy. Red indicates genomic regions with significant local genetic covariances. Text identifies the region as chromosome:start bp-end bp.

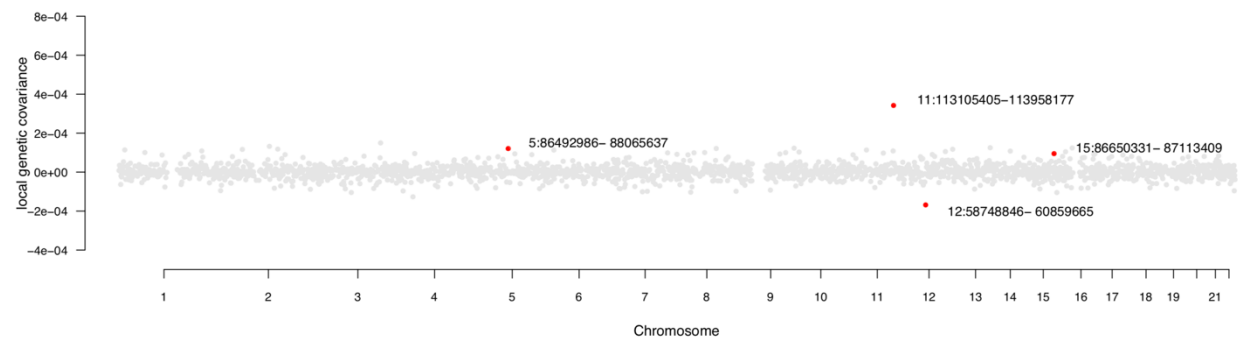

**Figure S3 (d):** Estimates of local genetic covariance between anxiety meta-analysis and drinks per week. Red indicates genomic regions with significant local genetic covariances. Text identifies the region as chromosome:start bp-end bp.



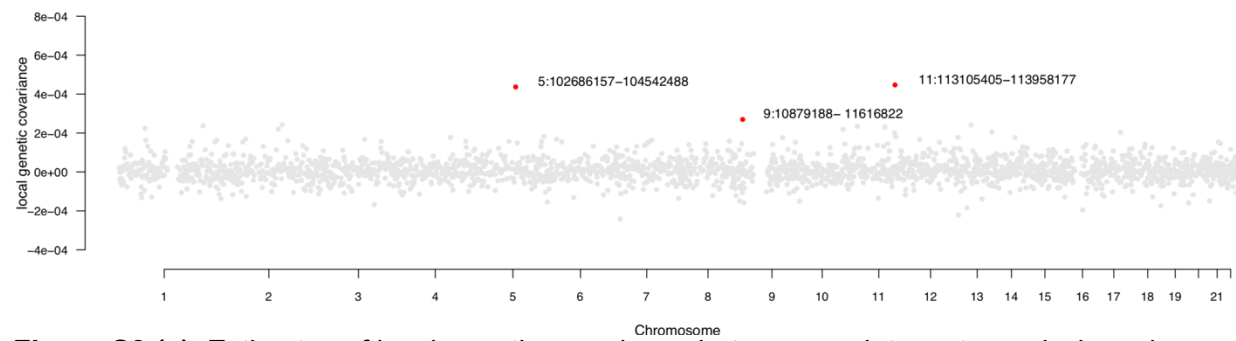

**Figure S3 (e):** Estimates of local genetic covariance between anxiety meta-analysis and AUDIT-P. Red indicates genomic regions with significant local genetic covariances. Text identifies the region as chromosome:start bp-end bp.

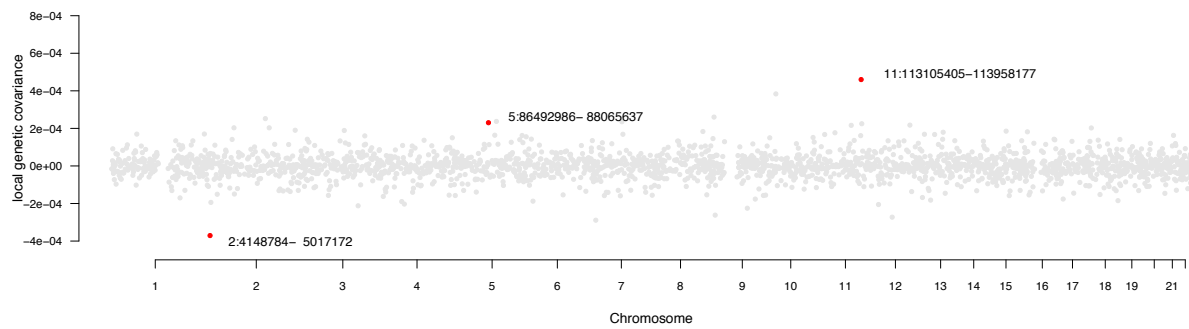

**Figure S3 (f):** Estimates of local genetic covariance between anxiety meta-analysis and AUDIT-T. Red indicates genomic regions with significant local genetic covariances. Text identifies the region as chromosome:start bp-end bp.

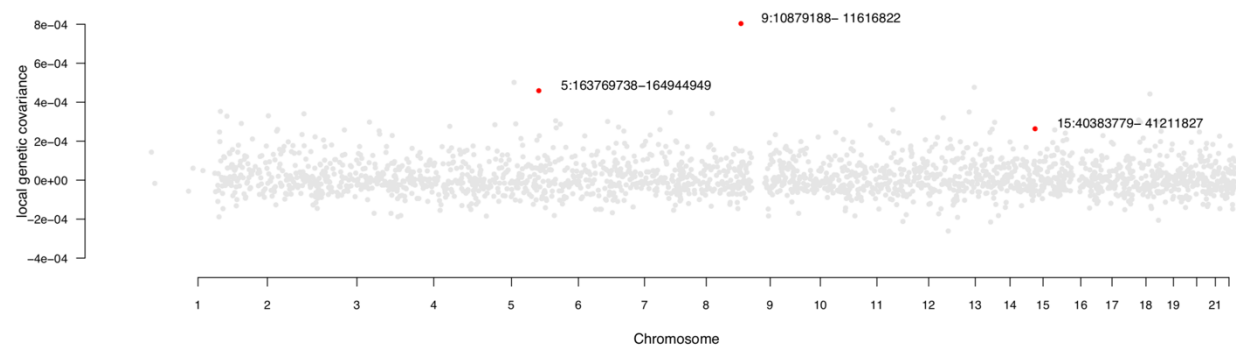

**Figure S3 (g):** Estimates of local genetic covariance between anxiety meta-analysis and UKB lifetime anxiety. Red indicates genomic regions with significant local genetic covariances. Text identifies the region as chromosome:start bp-end bp.

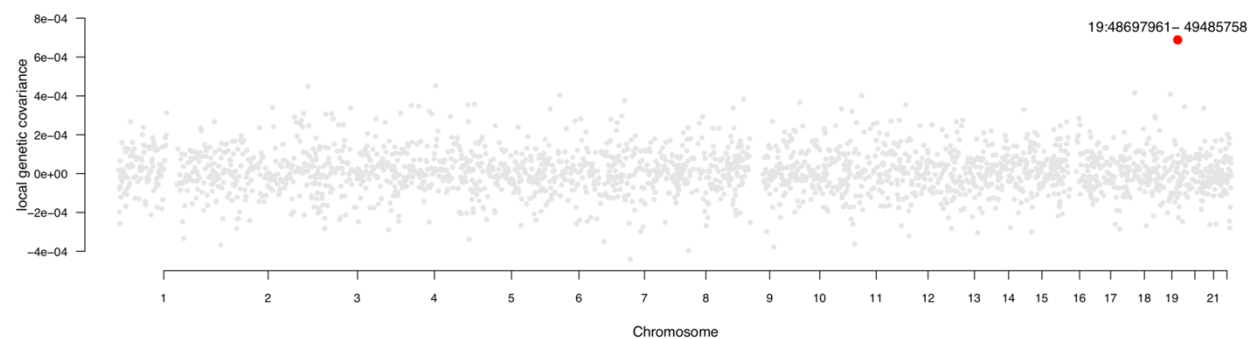

**Figure S4 (a):** Estimates of local genetic covariance between alcohol dependence and AUDIT-C. Red indicates genomic regions with significant local genetic covariances. Text identifies the region as chromosome:start bp-end bp.

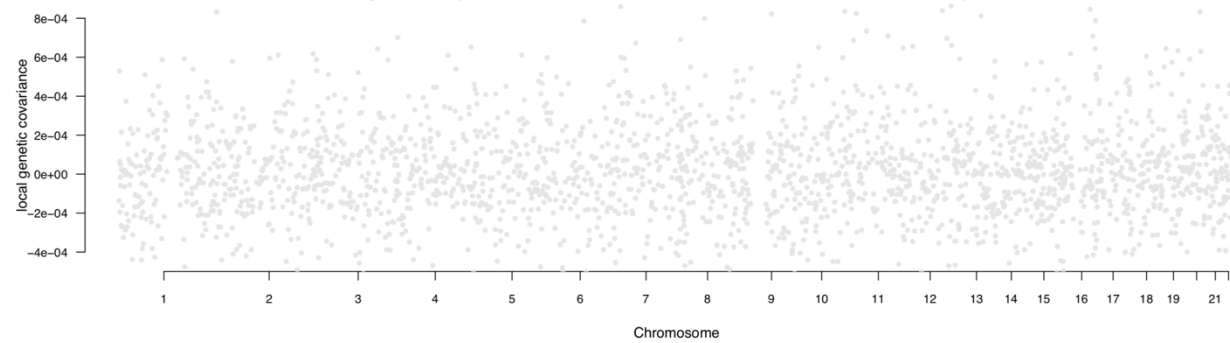

**Figure S4 (b):** Estimates of local genetic covariance between alcohol dependence and the Anxiety NeuroGenetics Study.

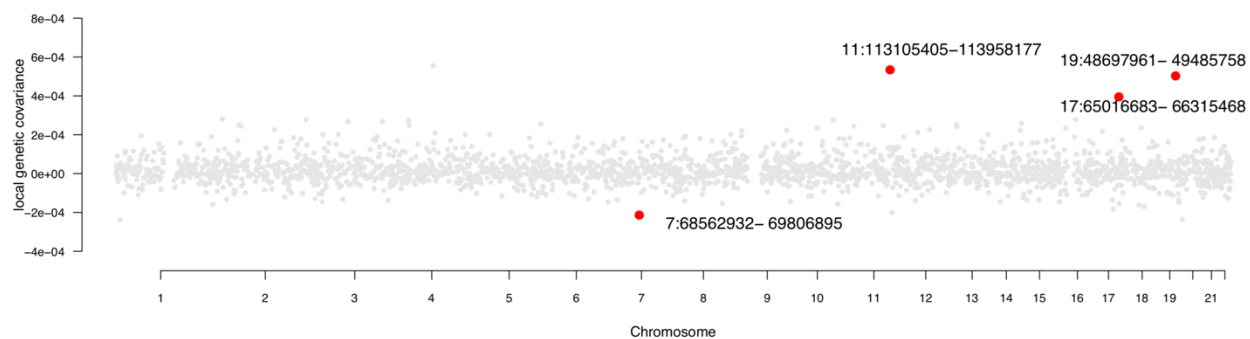

**Figure S4 (c):** Estimates of local genetic covariance between alcohol dependence and drinks per week. Red indicates genomic regions with significant local genetic covariances. Text identifies the region as chromosome:start bp-end bp.

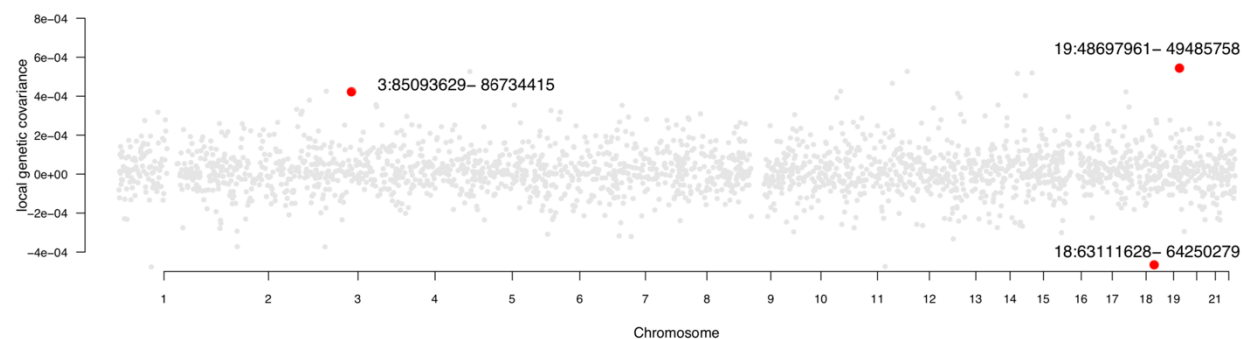

**Figure S4 (d):** Estimates of local genetic covariance between alcohol dependence and AUDIT-P. Red indicates genomic regions with significant local genetic covariances. Text identifies the region as chromosome:start bp-end bp.

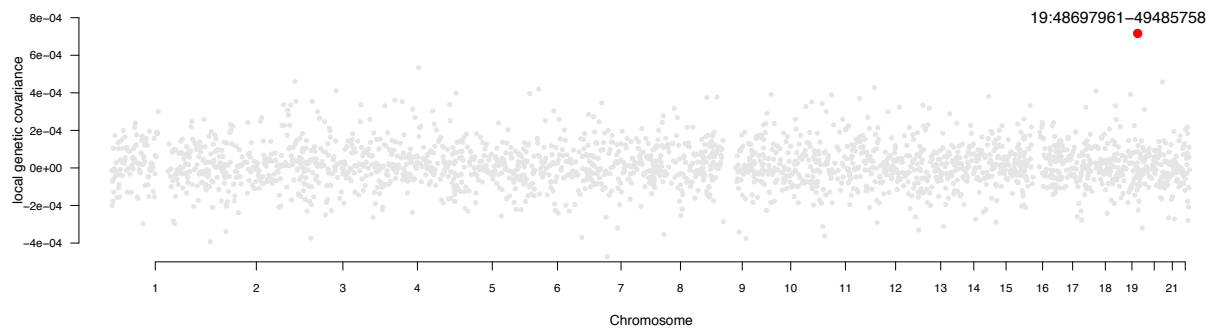

**Figure S4 (e):** Estimates of local genetic covariance between alcohol dependence and AUDIT-T. Red indicates genomic regions with significant local genetic covariances. Text identifies the region as chromosome:start bp-end bp.



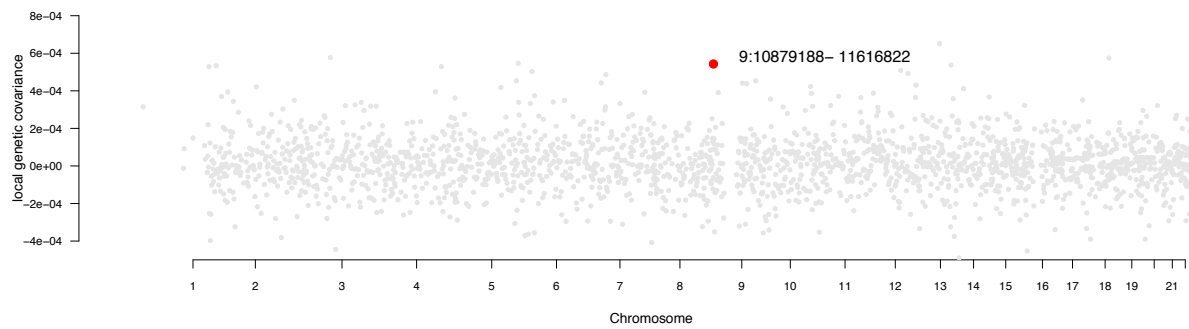

**Figure S4 (f):** Estimates of local genetic covariance between alcohol dependence and UKB lifetime anxiety. Red indicates genomic regions with significant local genetic covariances. Text identifies the region as chromosome:start bp-end bp.

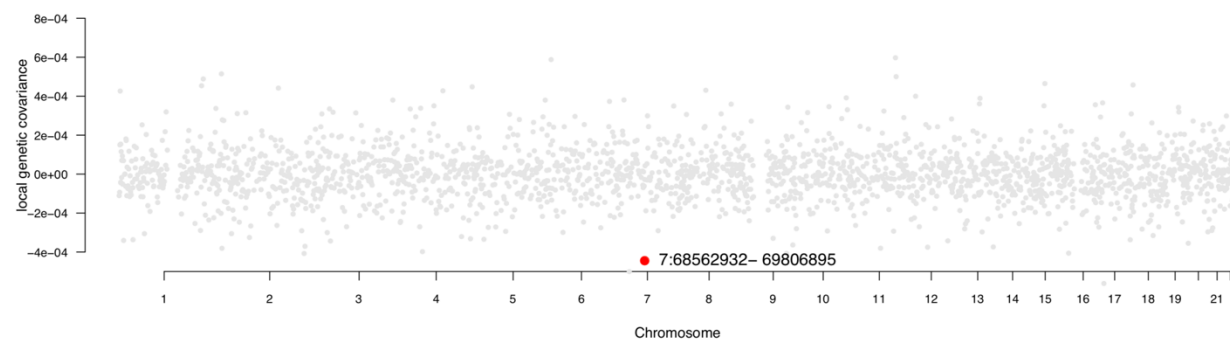

**Figure S5 (a):** Estimates of local genetic covariance between AUDIT-C and the Anxiety NeuroGenetics STudy. Red indicates genomic regions with significant local genetic covariances. Text identifies the region as chromosome:start bp-end bp.

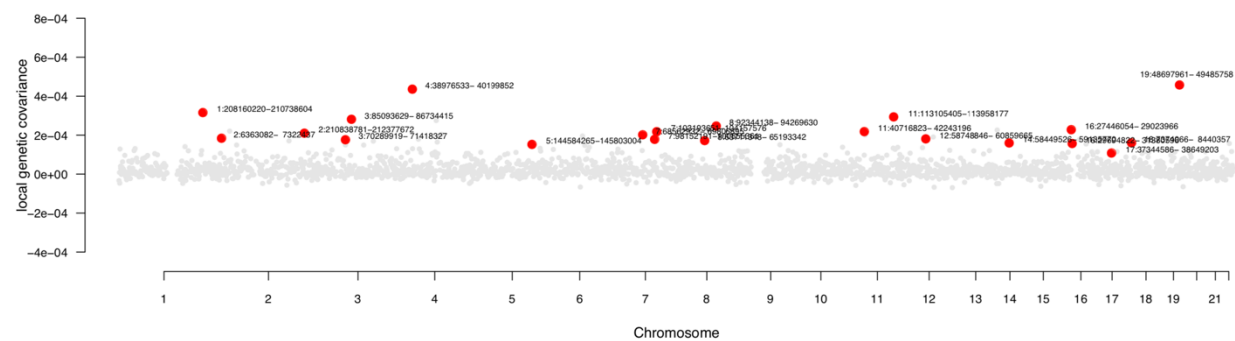

**Figure S5 (b):** Estimates of local genetic covariance between AUDIT-C and drinks per week. Red indicates genomic regions with significant local genetic covariances. Text identifies the region as chromosome:start bp-end bp.

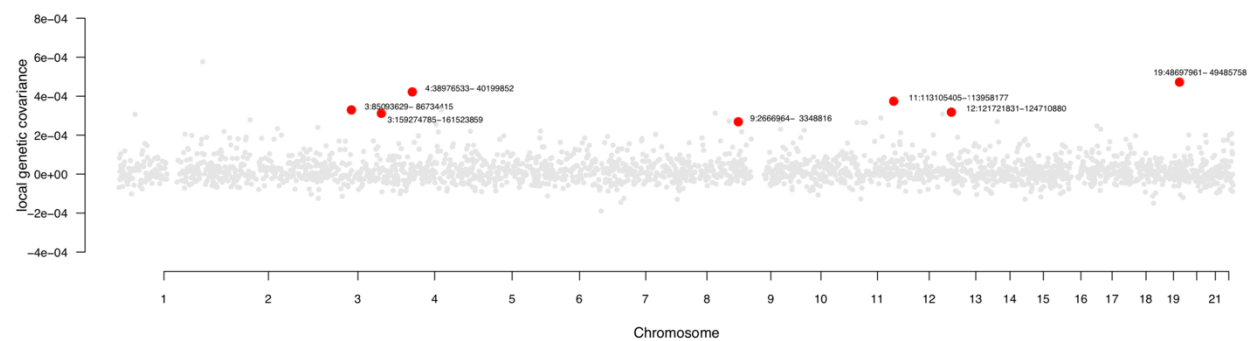

**Figure S5 (c):** Estimates of local genetic covariance between AUDIT-C and AUDIT-P. Red indicates genomic regions with significant local genetic covariances. Text identifies the region as chromosome:start bp-end bp.

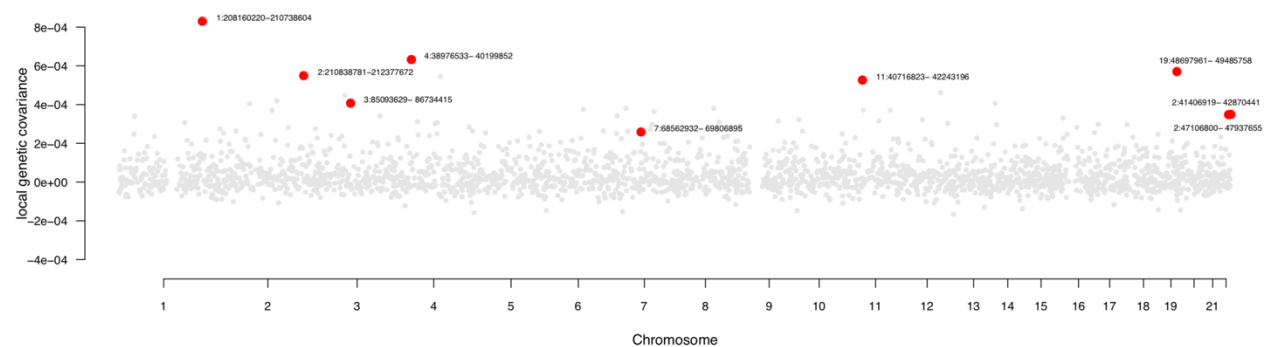

**Figure S5 (d):** Estimates of local genetic covariance between AUDIT-C and AUDIT-T. Red indicates genomic regions with significant local genetic covariances. Text identifies the region as chromosome:start bp-end bp.

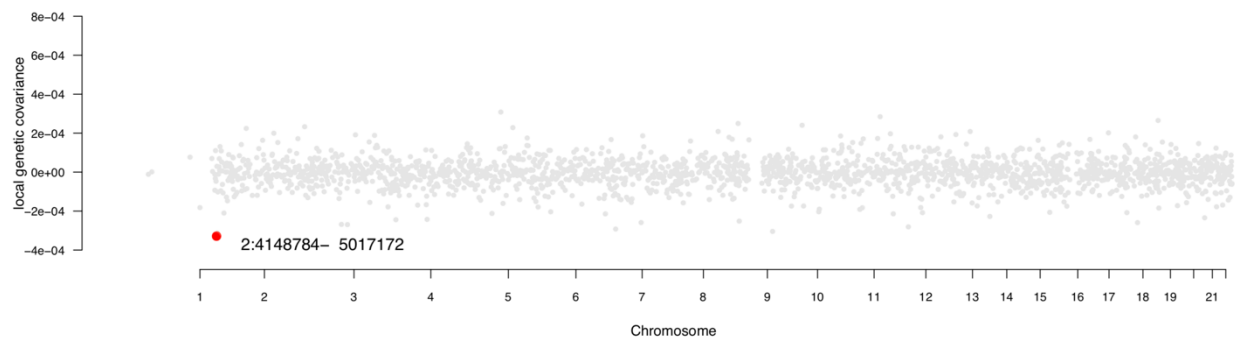

**Figure S5 (e):** Estimates of local genetic covariance between AUDIT-C and UKB lifetime anxiety. Red indicates genomic regions with significant local genetic covariances. Text identifies the region as chromosome:start bp-end bp.

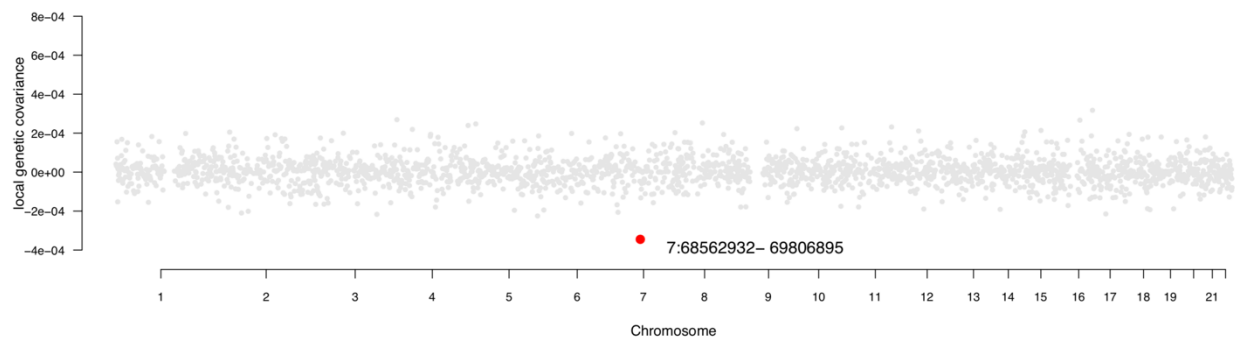

**Figure S6 (a):** Estimates of local genetic covariance between the Anxiety NeuroGenetics Study and drinks per week. Red indicates genomic regions with significant local genetic covariances. Text identifies the region as chromosome:start bp-end bp.

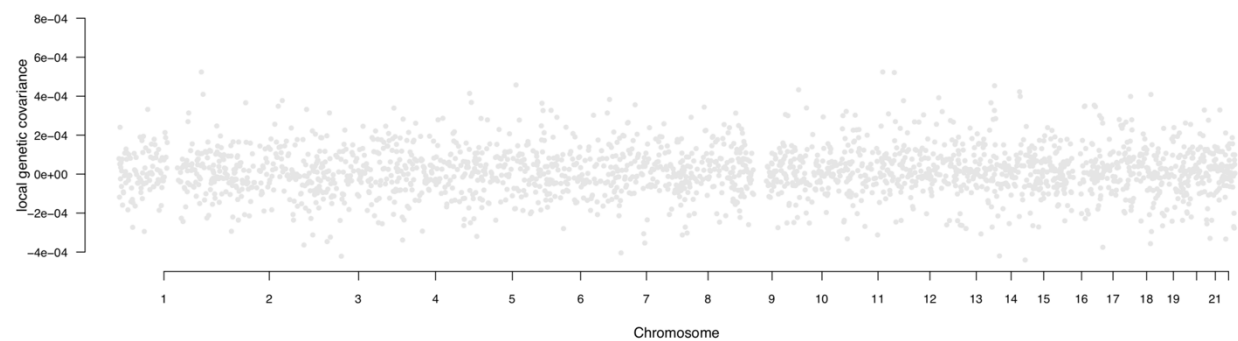

**Figure S6 (b):** Estimates of local genetic covariance between the Anxiety NeuroGenetics Study and AUDIT-P.



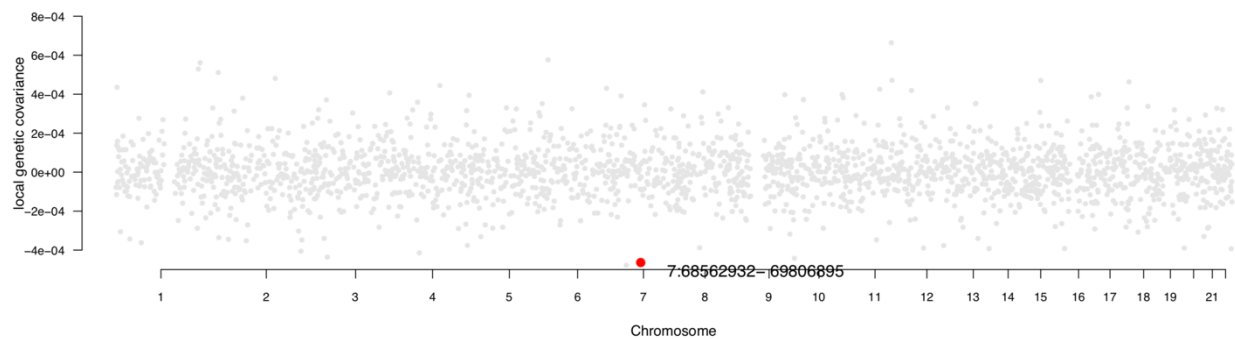

**Figure S6 (c):** Estimates of local genetic covariance between the Anxiety NeuroGenetics STudy and AUDIT-T. Red indicates genomic regions with significant local genetic covariances. Text identifies the region as chromosome:start bp-end bp.

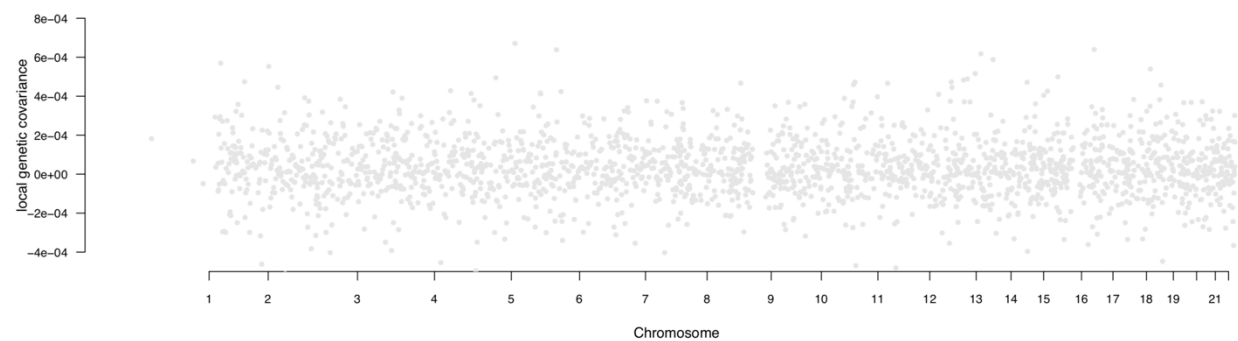

**Figure S6 (d):** Estimates of local genetic covariance between the Anxiety NeuroGenetics STudy and UKB lifetime anxiety.

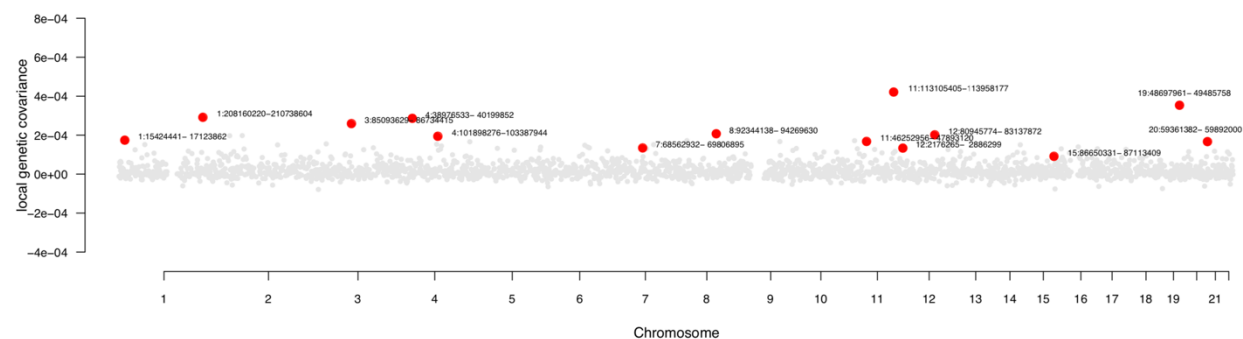

**Figure S7 (a):** Estimates of local genetic covariance between drinks per week and AUDIT-P. Red indicates genomic regions with significant local genetic covariances. Text identifies the region as chromosome:start bp-end bp.

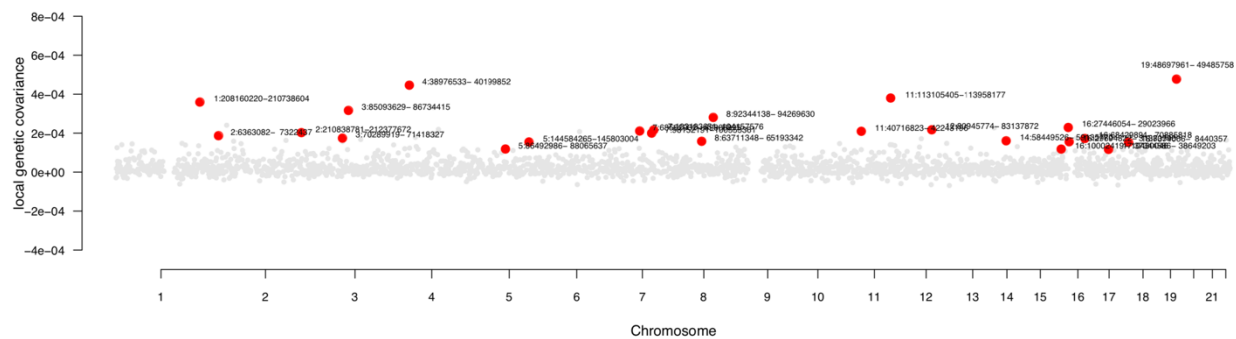

**Figure S7 (b):** Estimates of local genetic covariance between drinks per week and AUDIT-T. Red indicates genomic regions with significant local genetic covariances. Text identifies the region as chromosome:start bp-end bp.

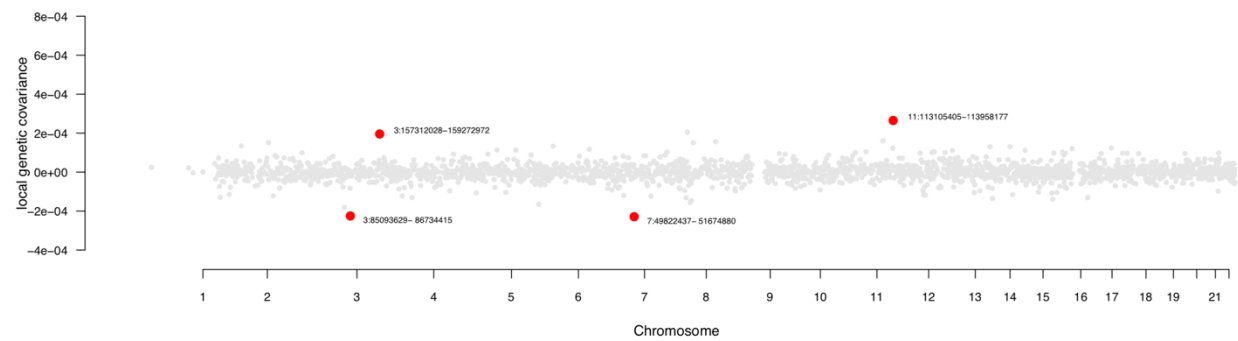

**Figure S7 (c):** Estimates of local genetic covariance between drinks per week and UKB lifetime anxiety. Red indicates genomic regions with significant local genetic covariances. Text identifies the region as chromosome:start bp-end bp.

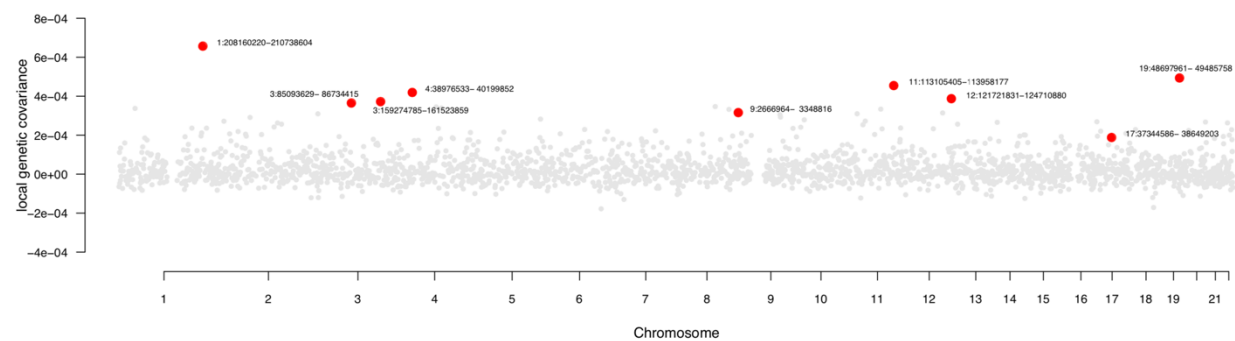

**Figure S8 (a):** Estimates of local genetic covariance between the AUDIT-P and AUDIT-T. Red indicates genomic regions with significant local genetic covariances. Text identifies the region as chromosome:start bp-end bp.

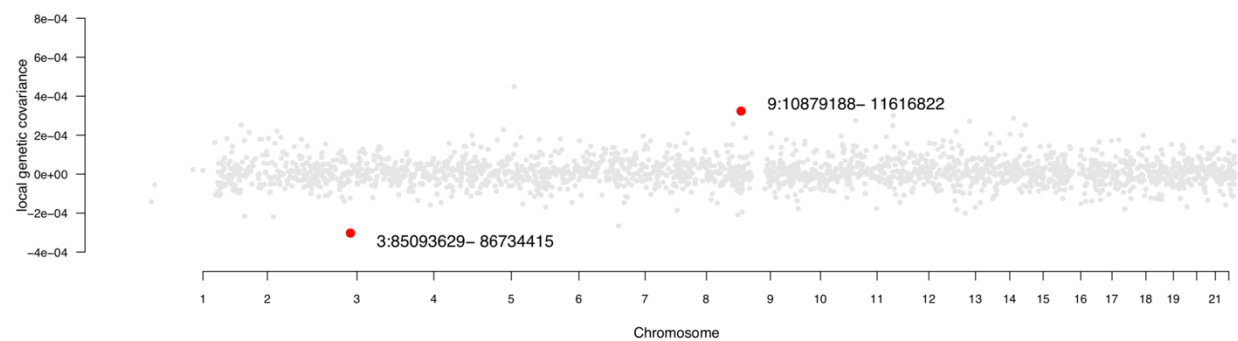

**Figure S8 (b):** Estimates of local genetic covariance between the AUDIT-P and UKB lifetime anxiety. Red indicates genomic regions with significant local genetic covariances. Text identifies the region as chromosome:start bp-end bp.

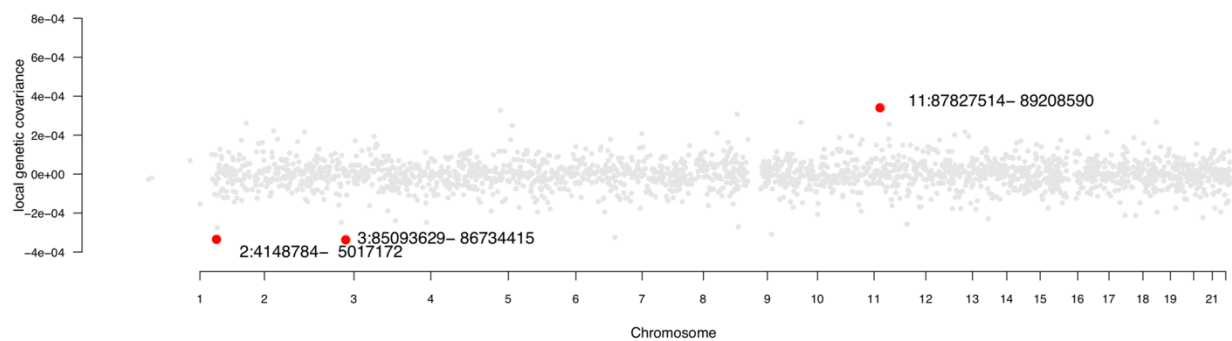

**Figure S9 (a):** Estimates of local genetic covariance between the AUDIT-T and UKB lifetime anxiety. Red indicates genomic regions with significant local genetic covariances. Text identifies the region as chromosome:start bp-end bp.



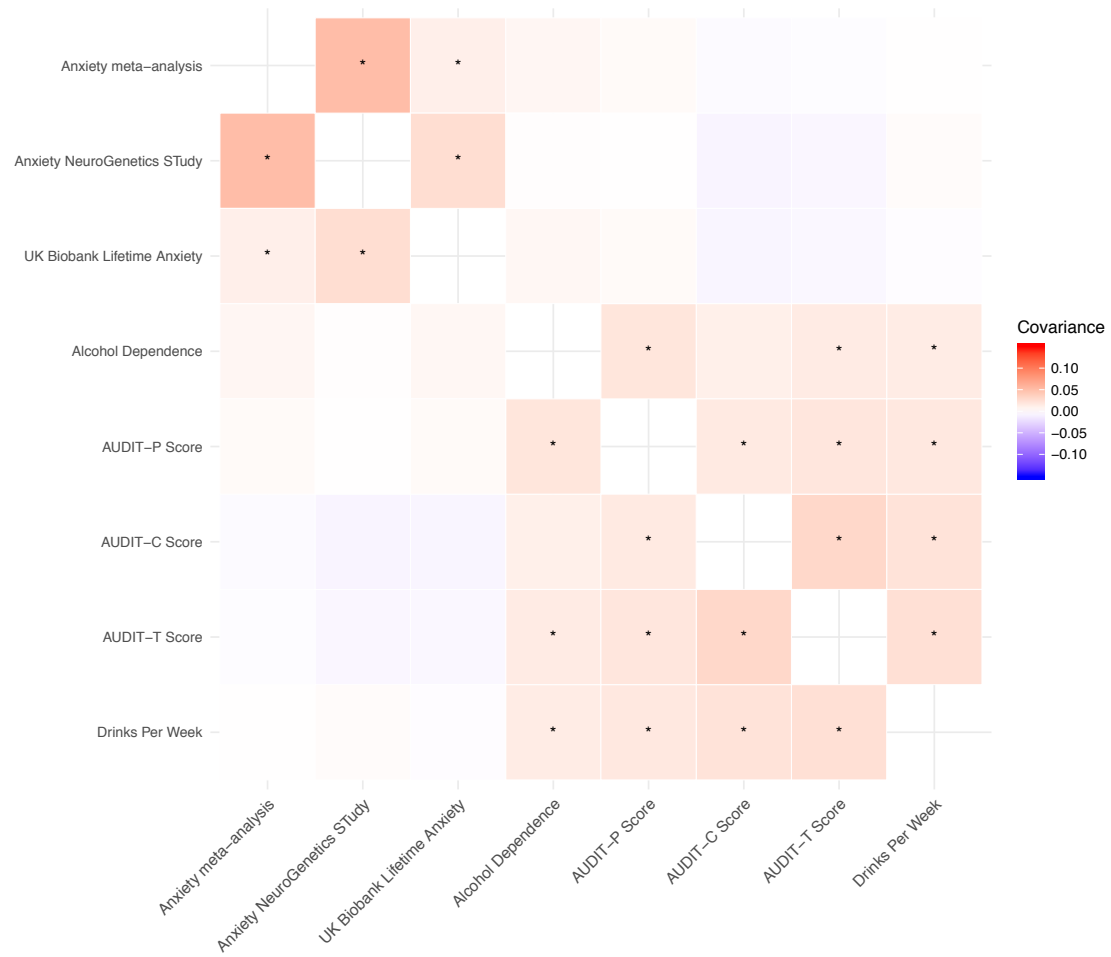

**Figure S10:** Estimates of genetic covariance in the predicted functional genome. Asterisks indicate significant ( $p_{\text{func}} < 8.93 \times 10^{-4}$ ) covariance estimates.

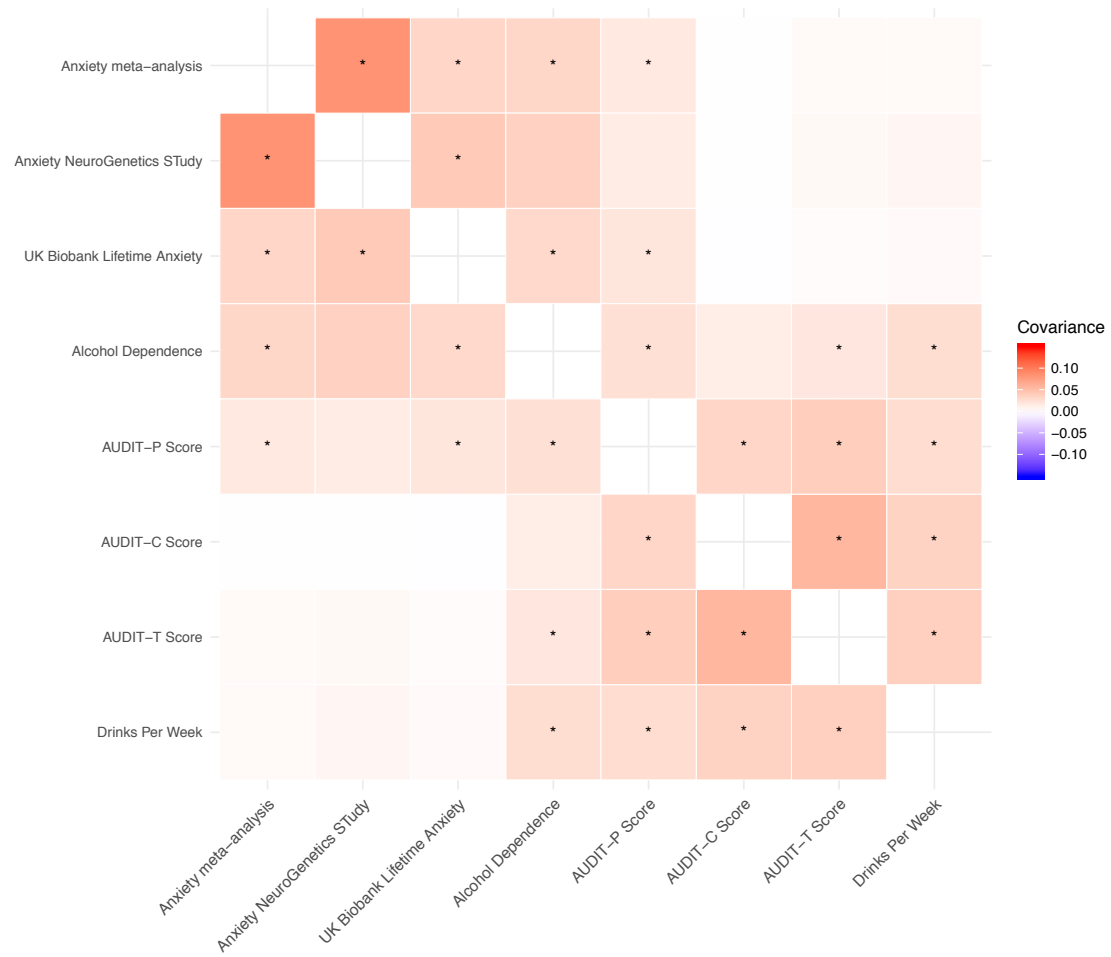

**Figure S11:** Estimates of genetic covariance in the predicted non-functional genome. Asterisks indicate significant ( $p_{\text{func}} < 8.93 \times 10^{-4}$ ) covariance estimates.

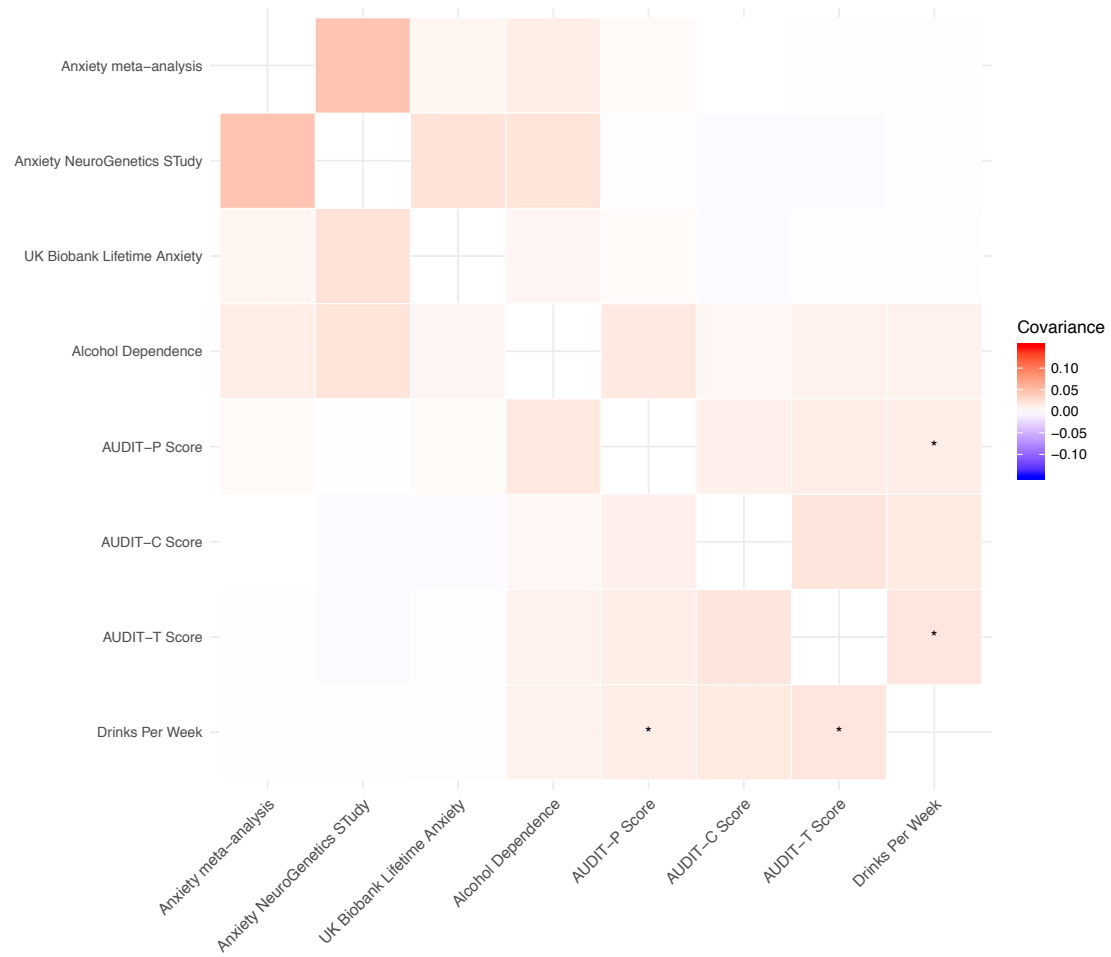

**Figure S12:** Estimates of genetic covariance in immune tissue. Asterisks indicate significant ( $p_{\text{tissue}} < 2.6 \times 10^{-4}$ ) stratified covariance estimates.

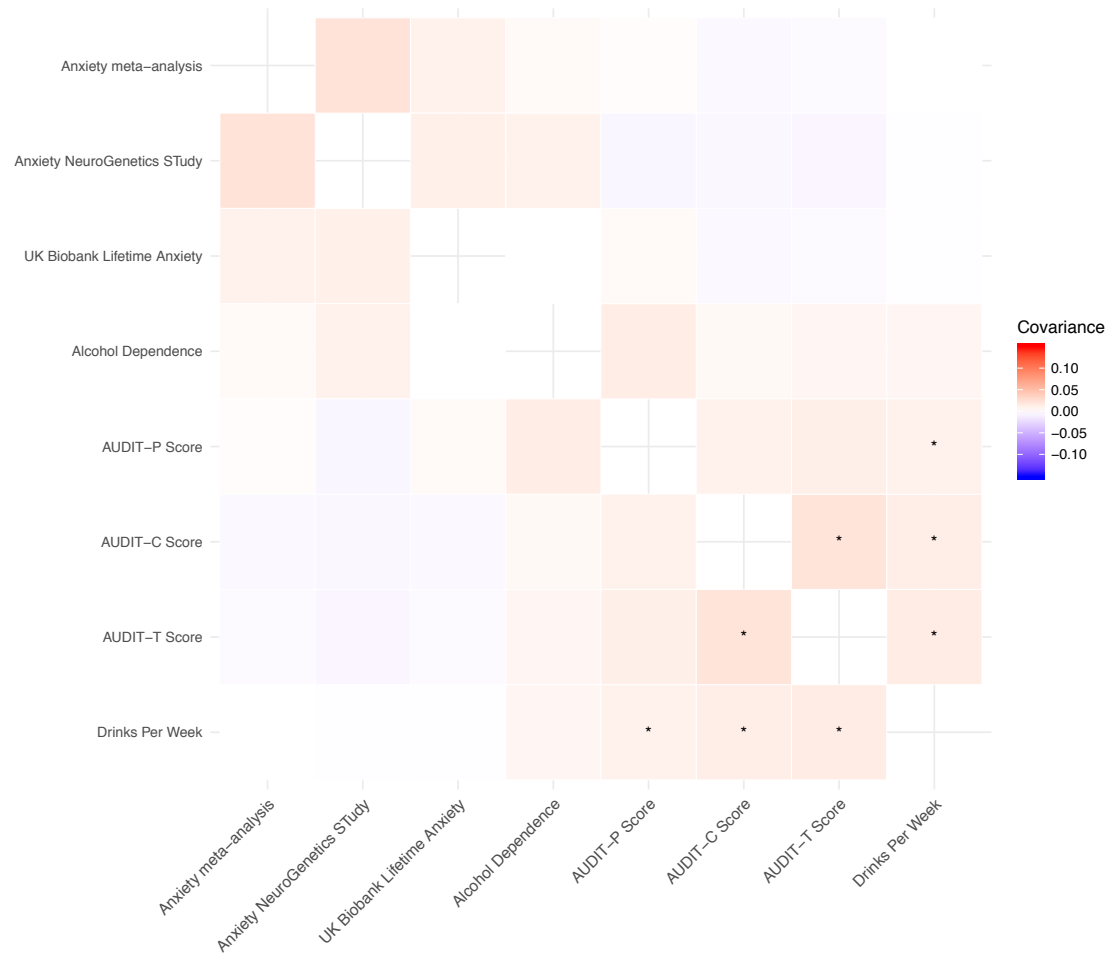

**Figure S13:** Estimates of genetic covariance in brain tissue. Asterisks indicate significant ( $p_{\text{tissue}} < 2.6 \times 10^{-4}$ ) stratified covariance estimates.

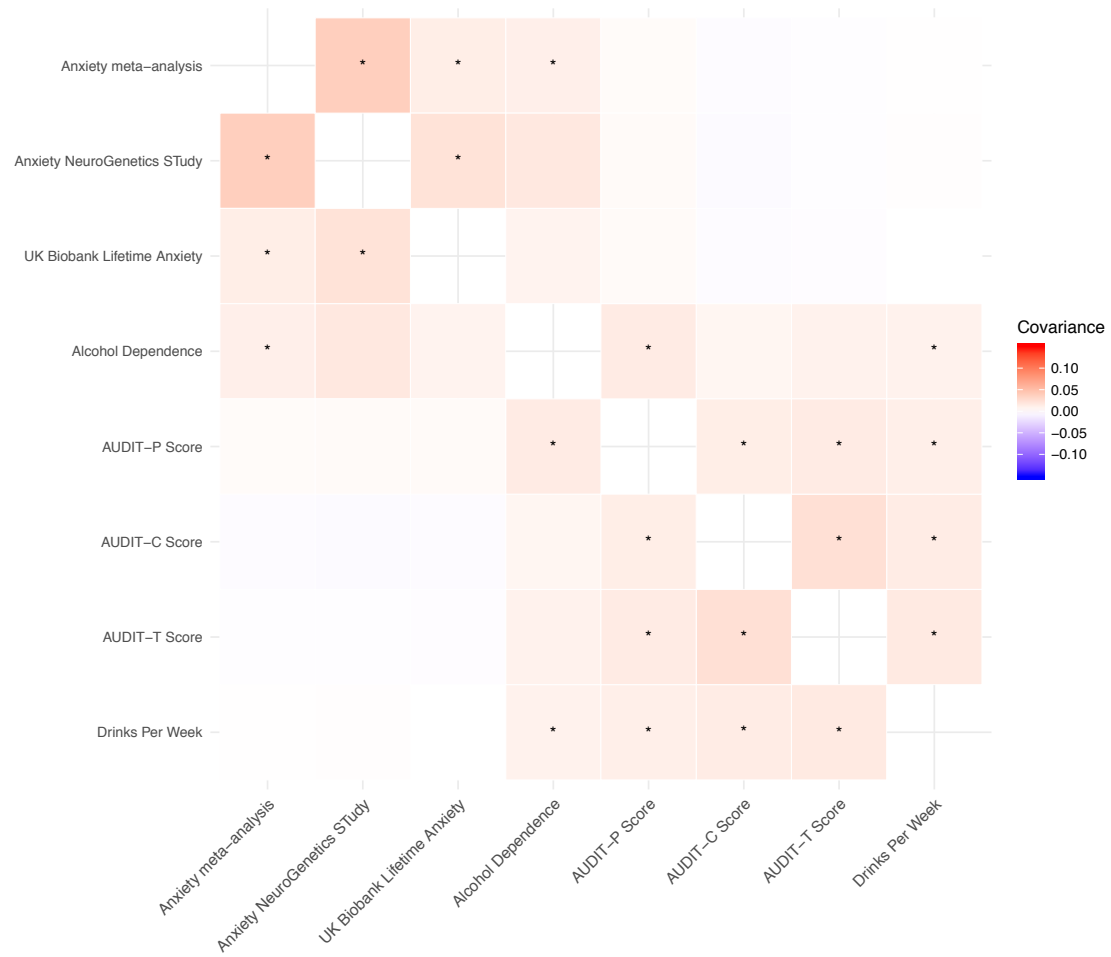

**Figure S14:** Estimates of genetic covariance in the frontal cortex. Asterisks indicate significant ( $p_{\text{brain}} < 1.37 \times 10^{-4}$ ) stratified covariance estimates.

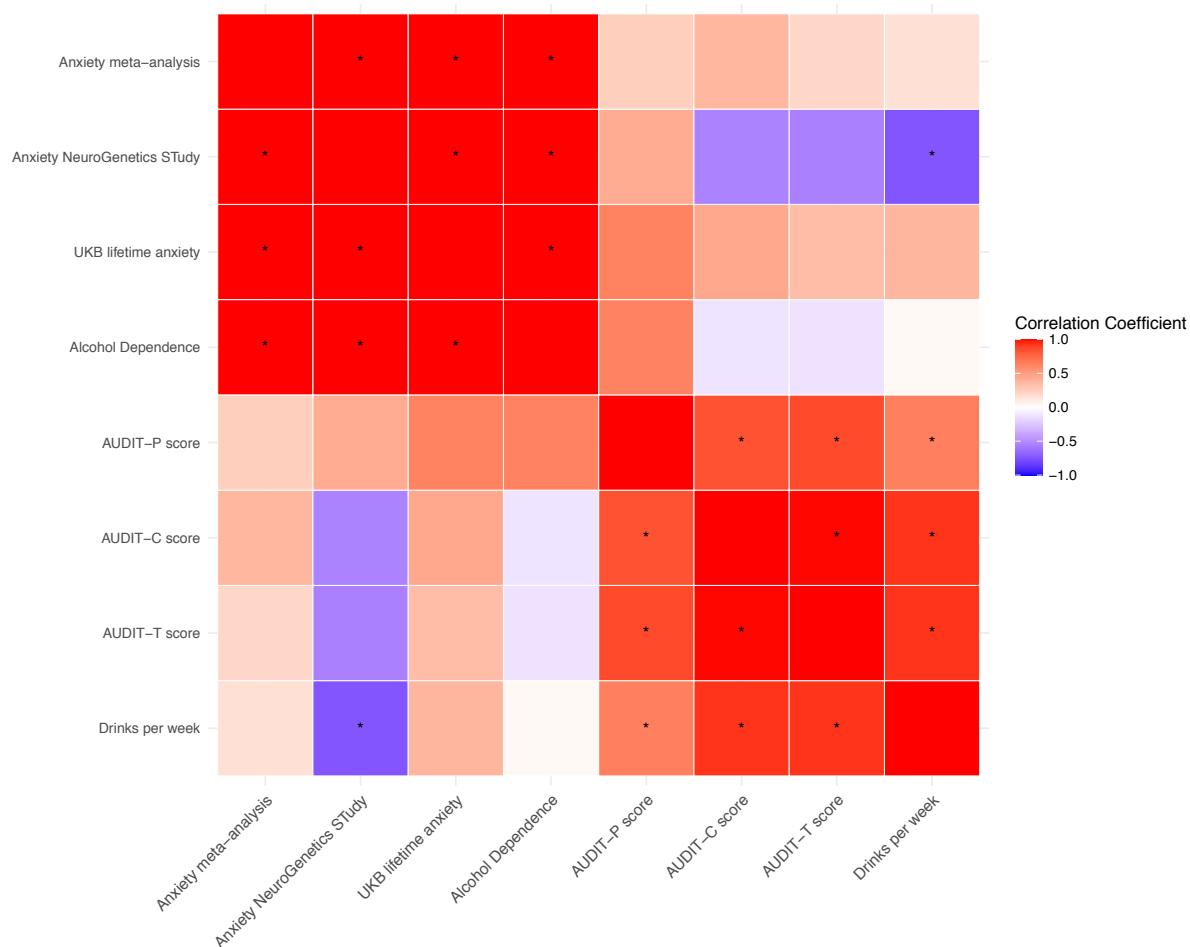

**Figure S15:** Estimates of correlation of LDSC regression coefficients from the baseline analysis. Asterisks indicated regression coefficient correlation estimates that pass the FDR < 5% cutoff.

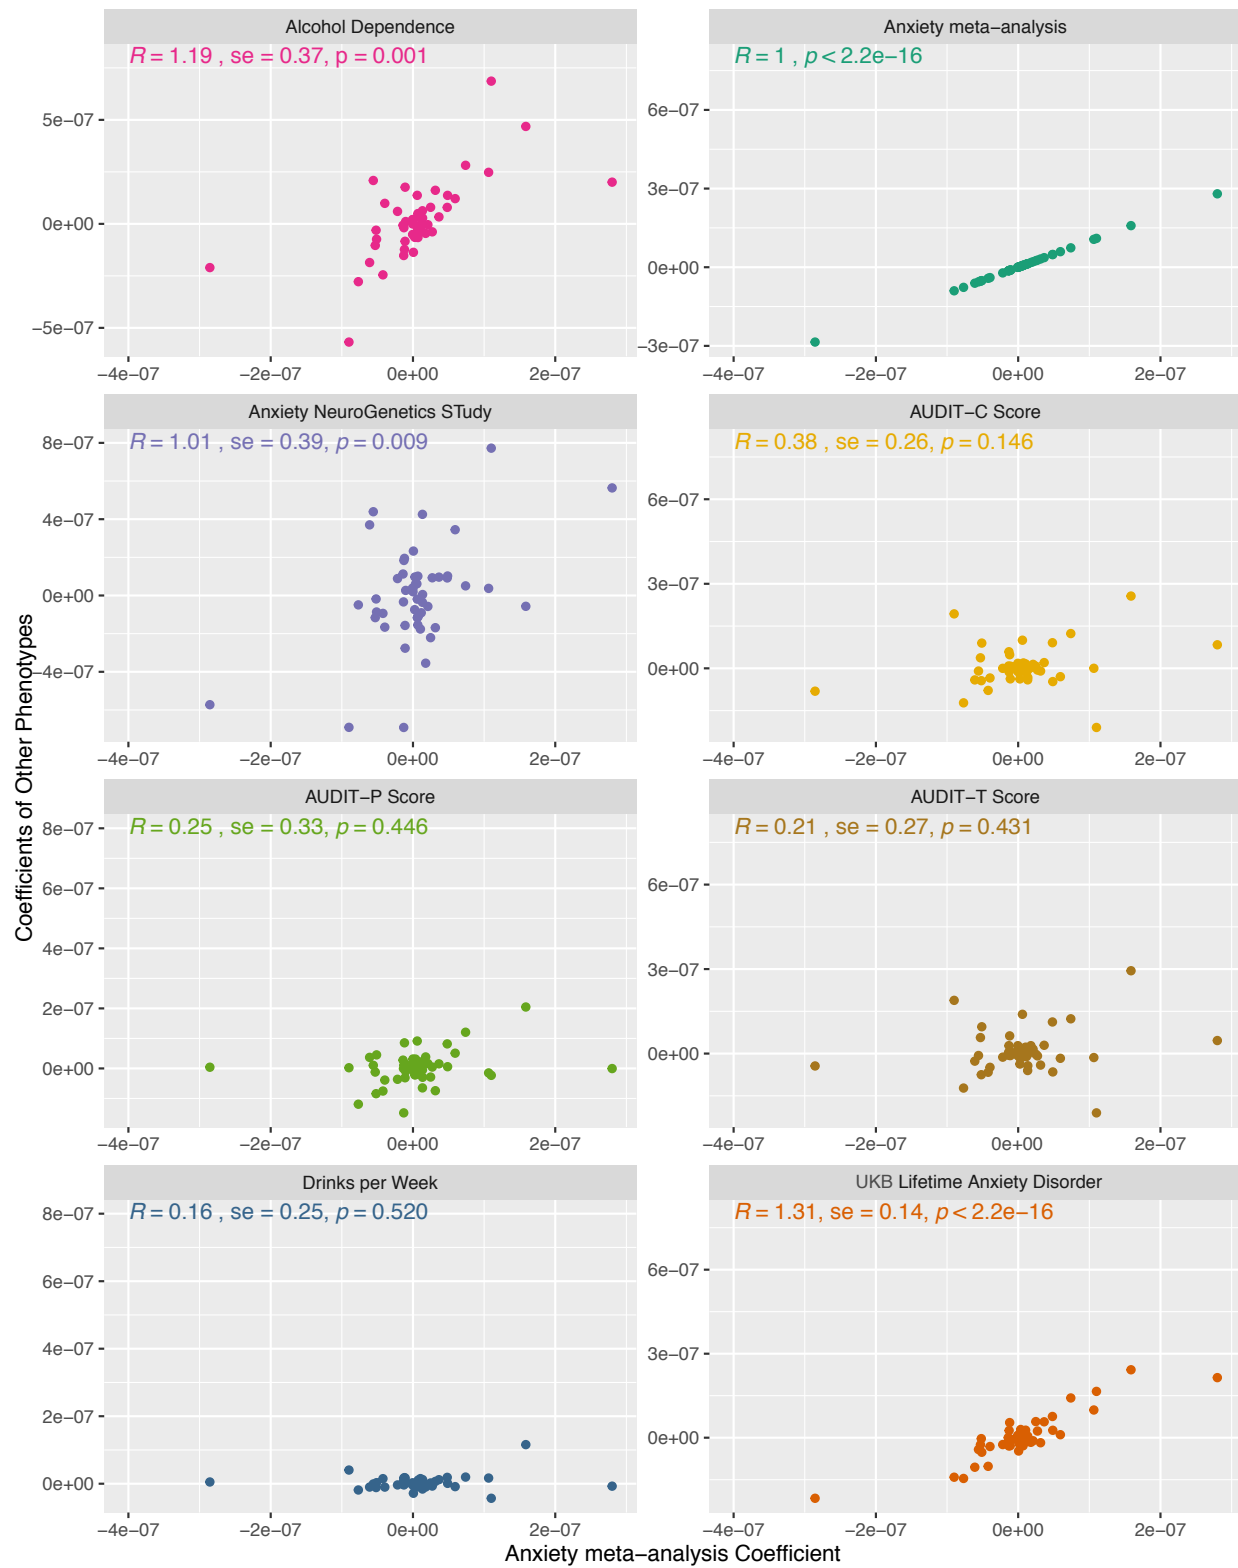

**Figure S16 (a):** Baseline regression coefficient correlation between anxiety meta-analysis and other phenotypes.

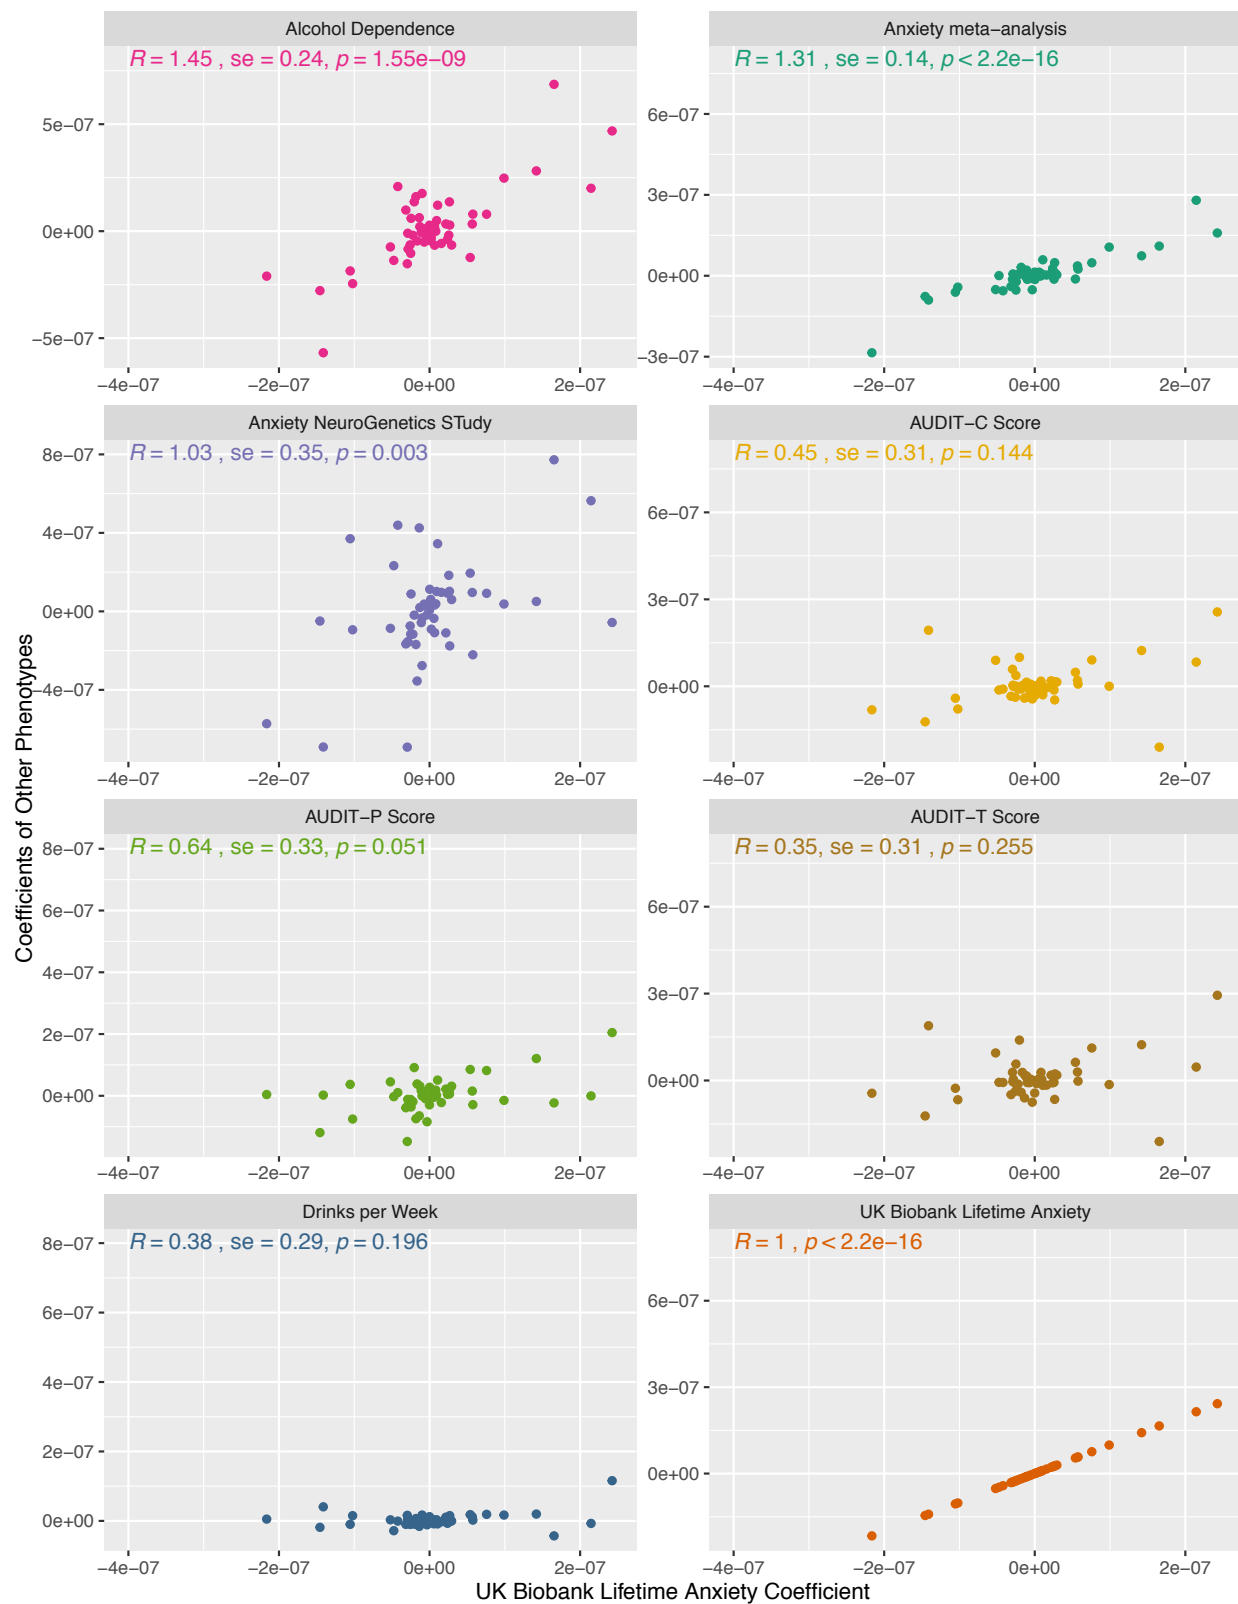

**Figure S16 (b):** Baseline regression coefficient correlation between UK Biobank lifetime anxiety and other phenotypes.



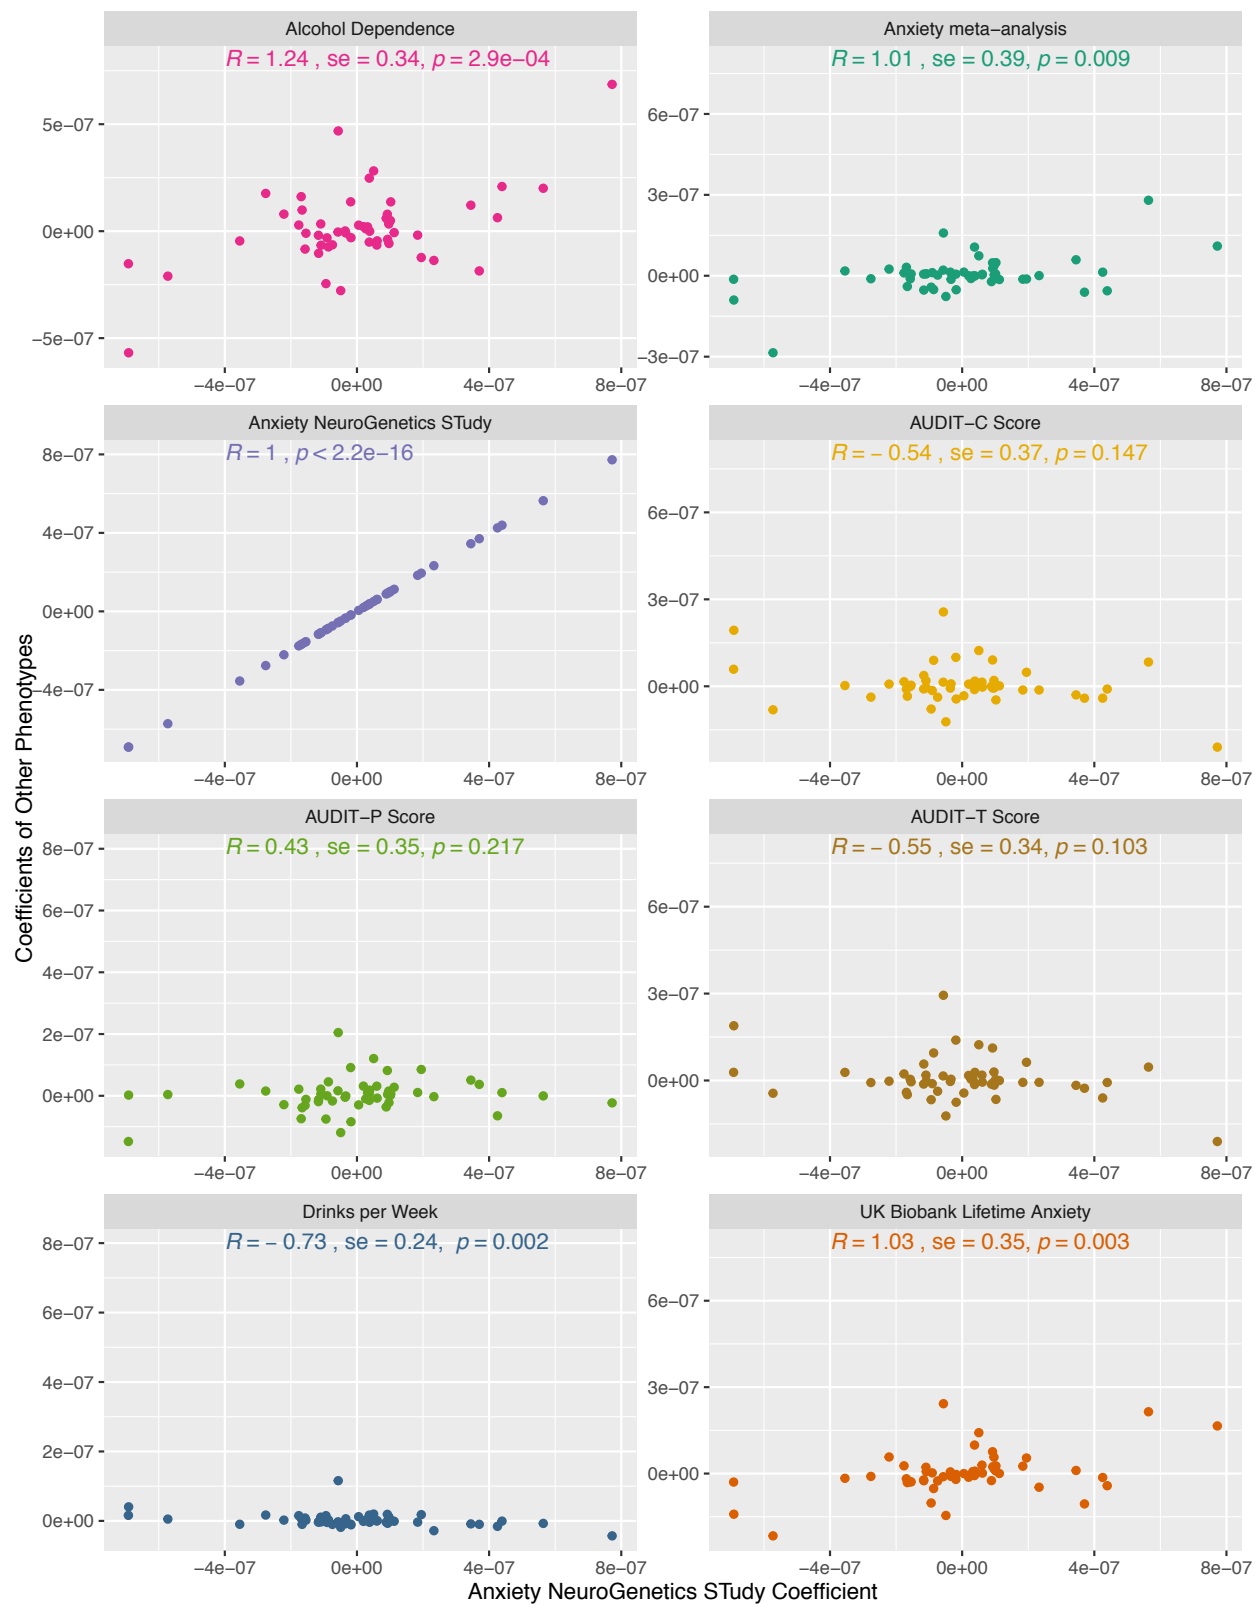

**Figure S16 (c):** Baseline regression coefficient correlation between ANGST and other phenotypes.

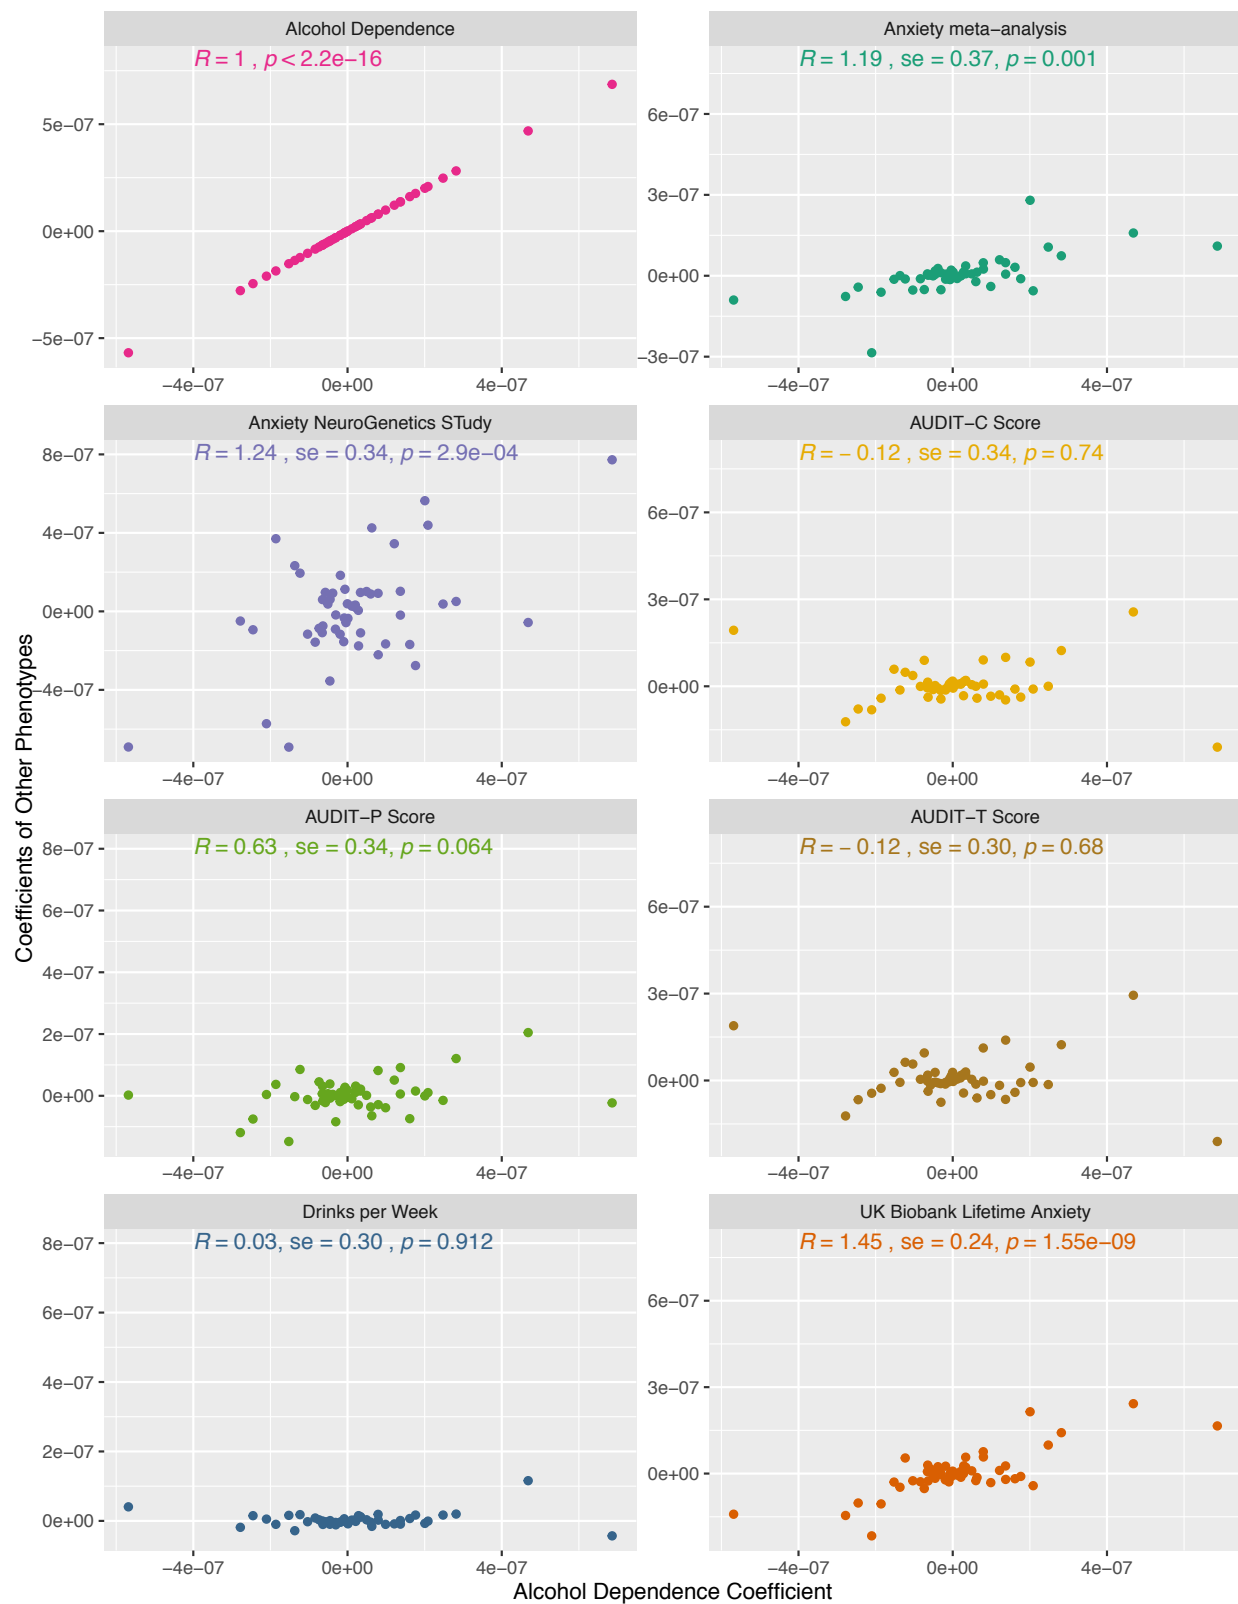

**Figure S16 (d):** Baseline regression coefficient correlation between alcohol dependence and other phenotypes.

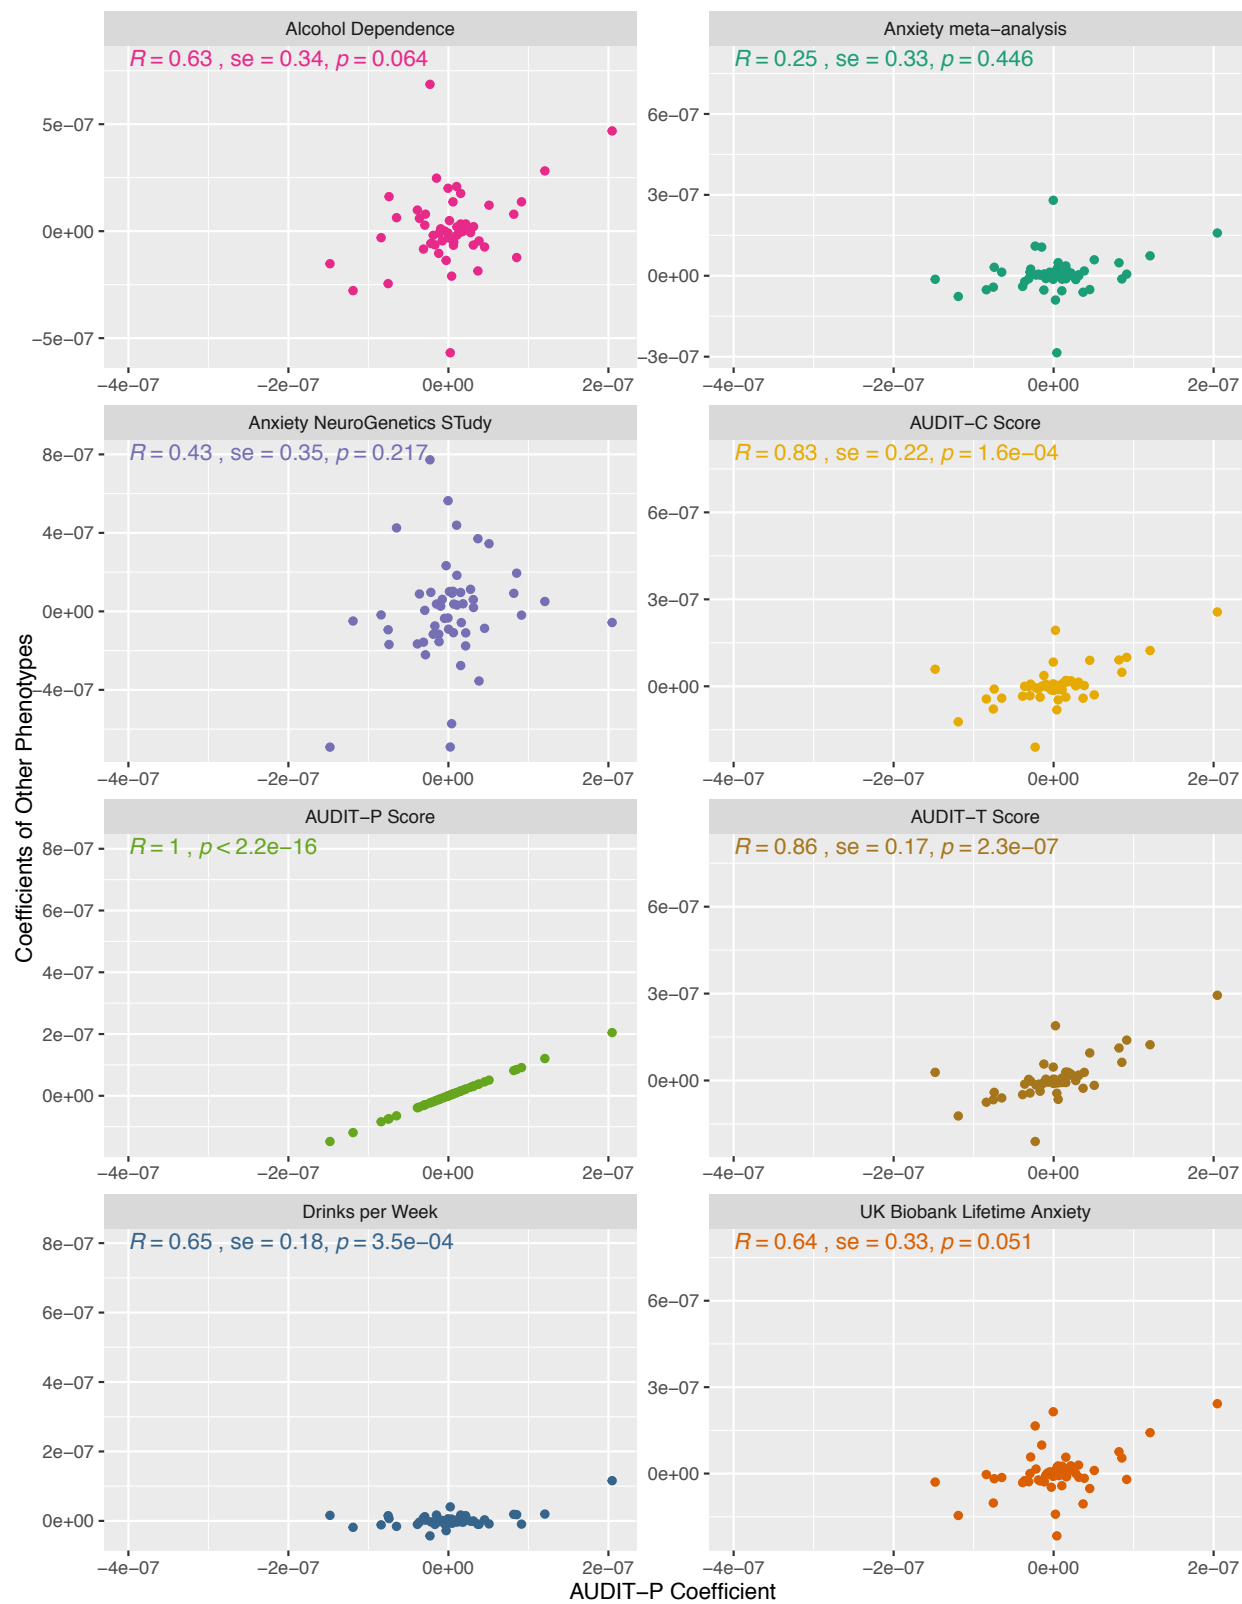

**Figure S16 (e):** Baseline regression coefficient correlation between AUDIT-P and other phenotypes.

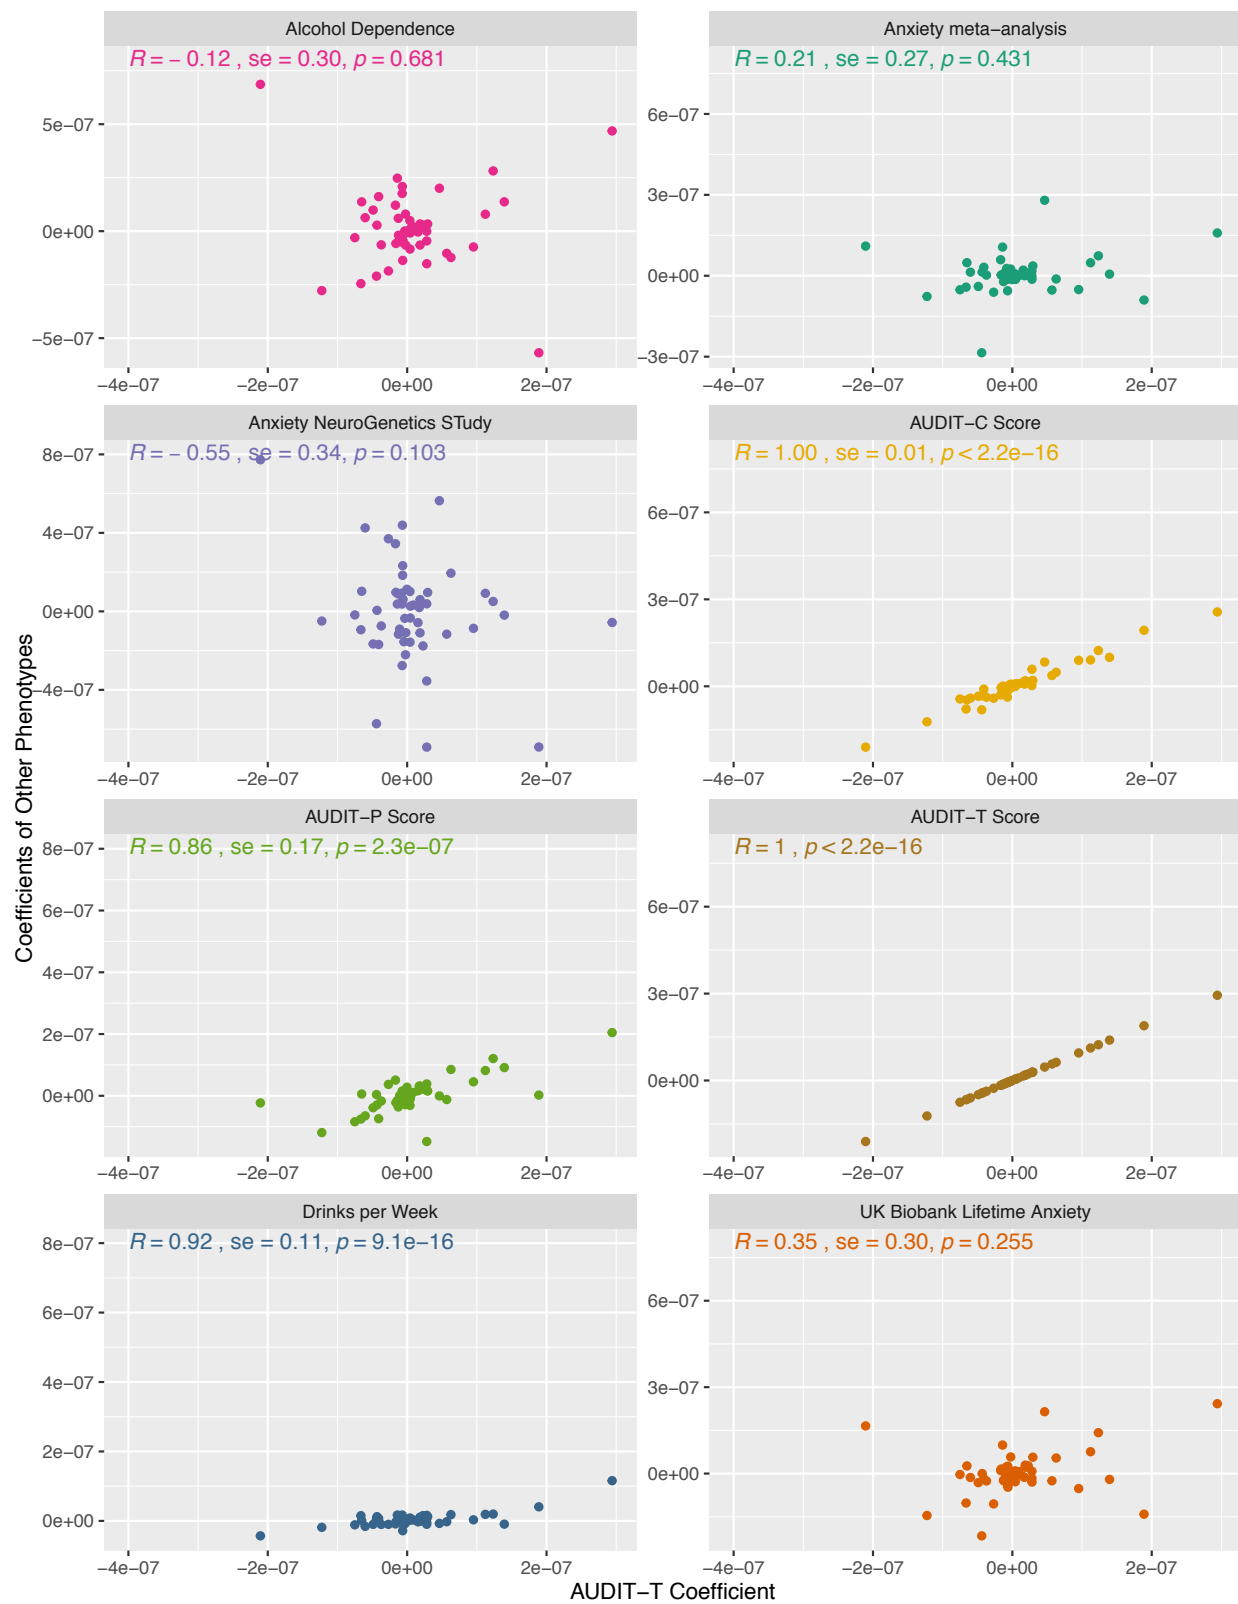

**Figure S16 (f):** Baseline regression coefficient correlation between AUDIT-T and other phenotypes.

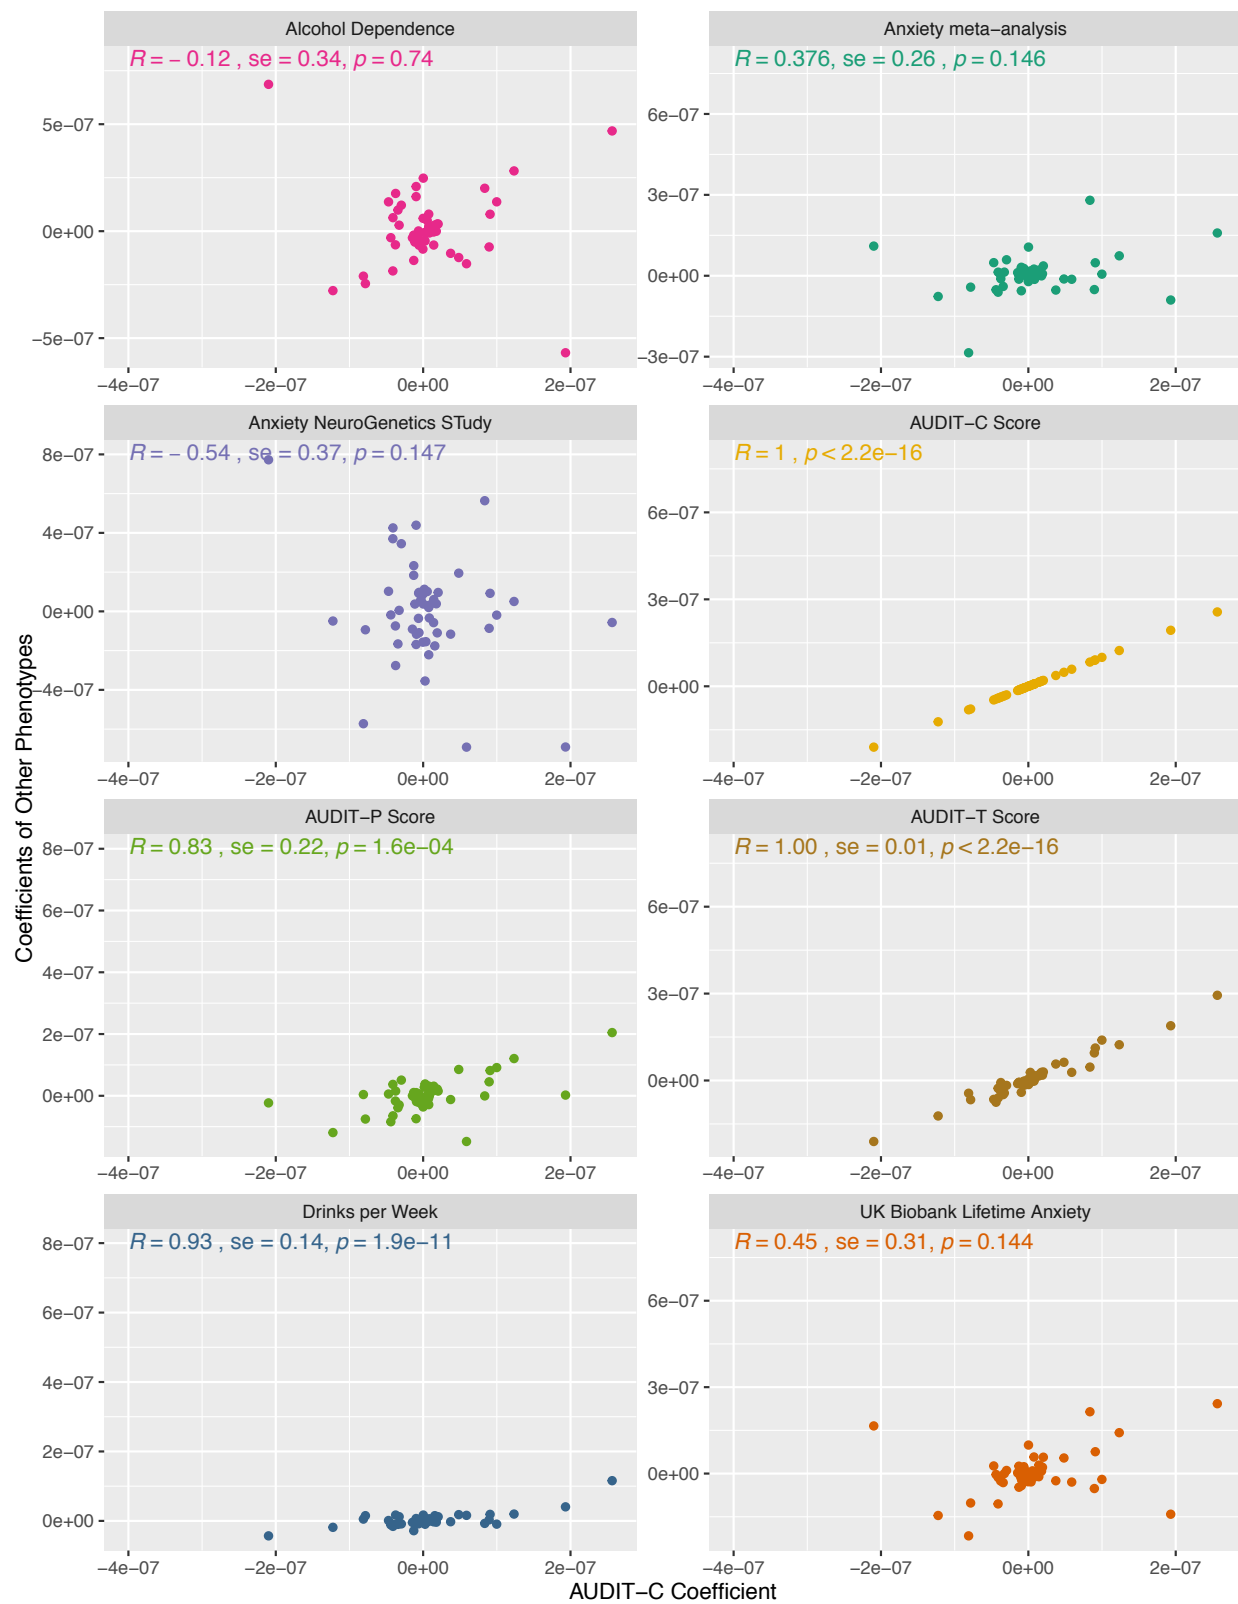

**Figure S16 (g):** Baseline regression coefficient correlation between AUDIT-C and other phenotypes.

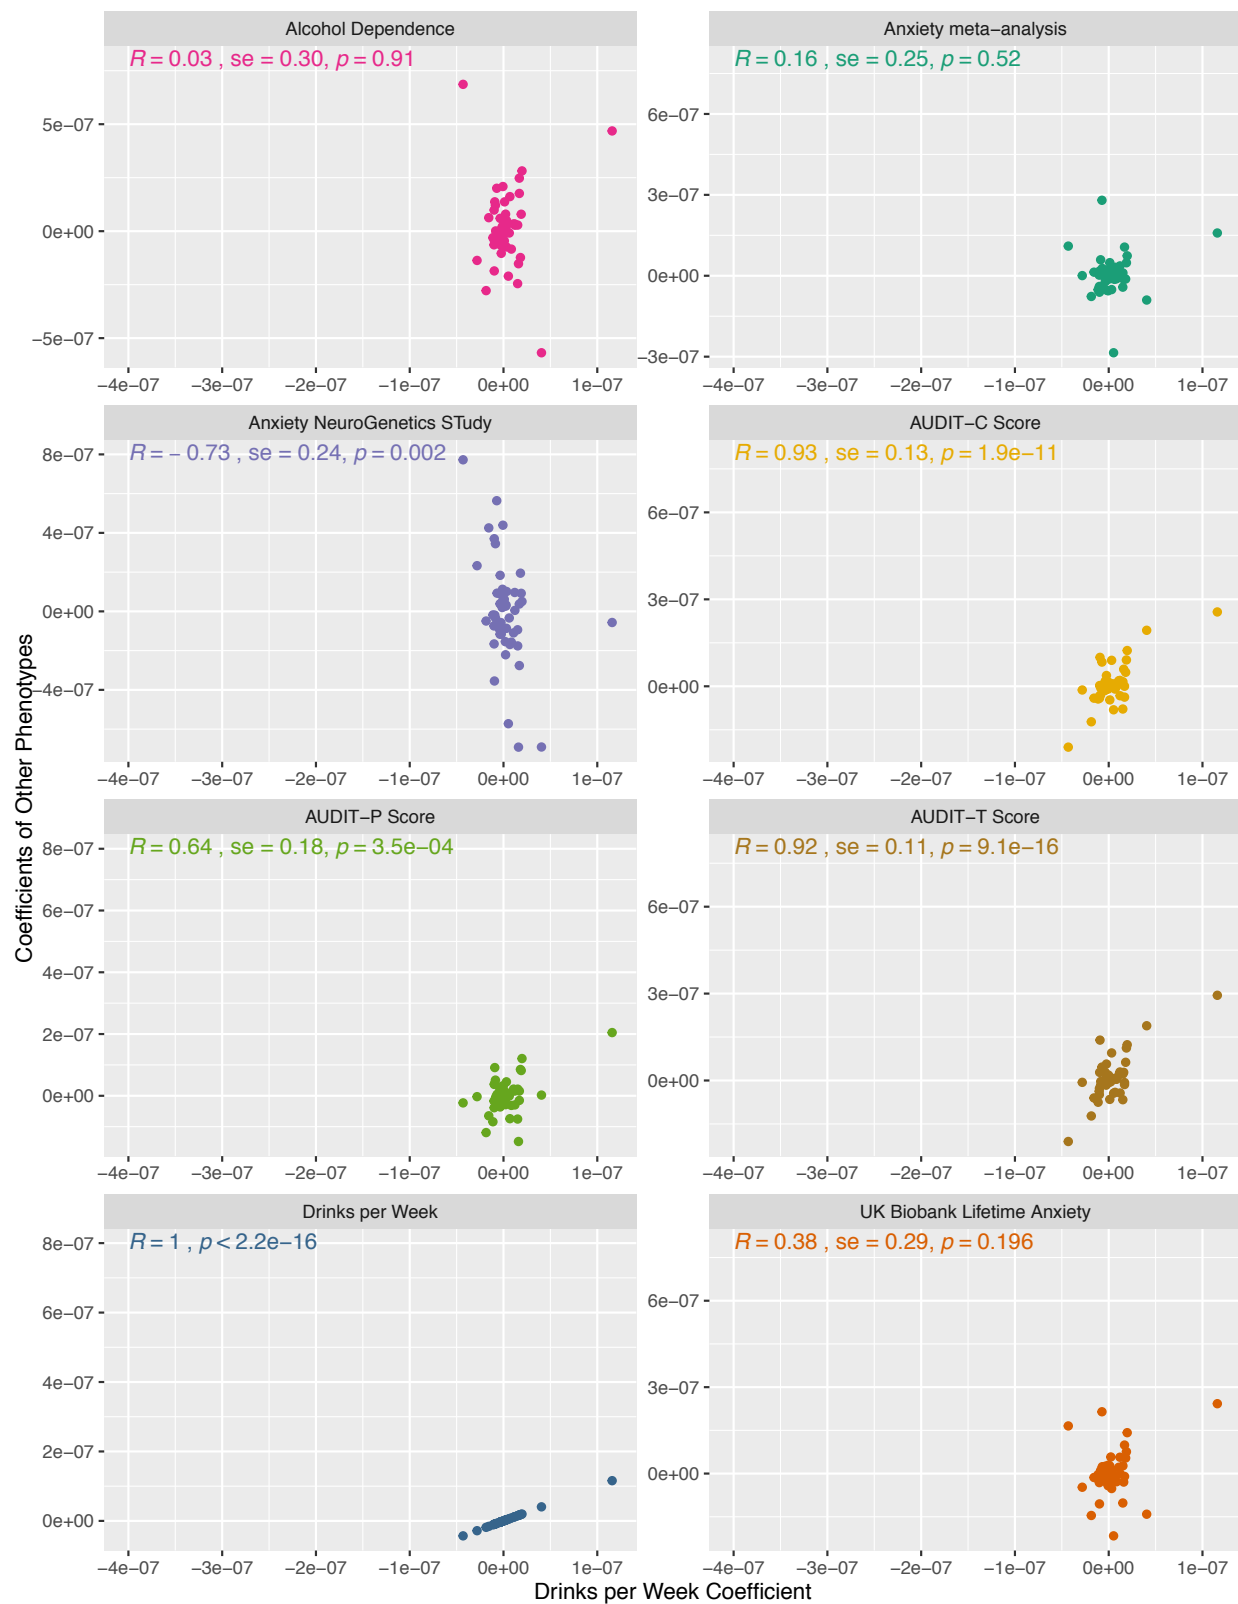

**Figure S16 (h):** Baseline regression coefficient correlation between drinks per week and other phenotypes.

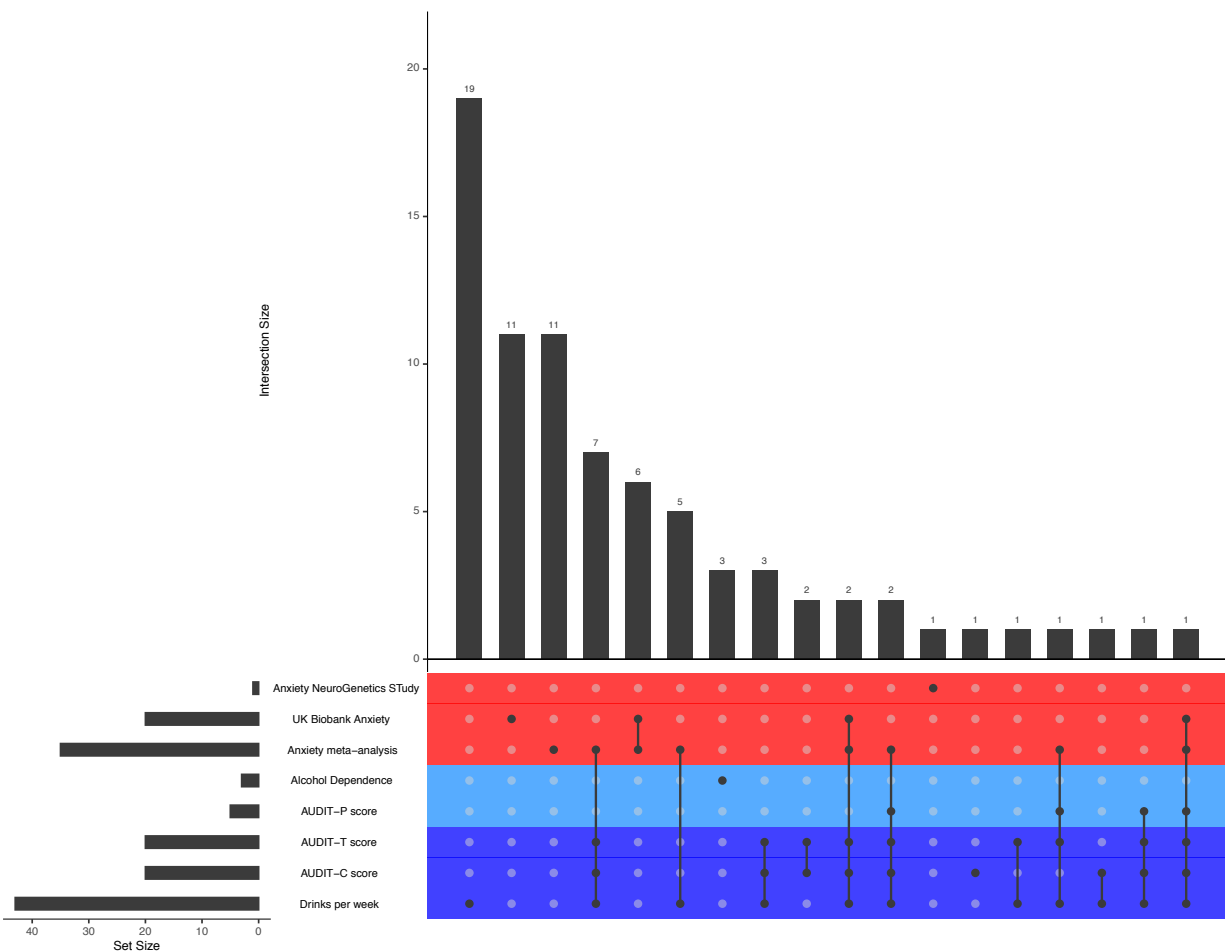

**Figure S17:** Plot of cell type- and tissue-specific annotations with enrichment scores that pass the FDR < 5% cutoff. The colors represent the three phenotypic categories of the sets: anxiety disorders (red), PAU (light blue) and alcohol consumption (dark blue).

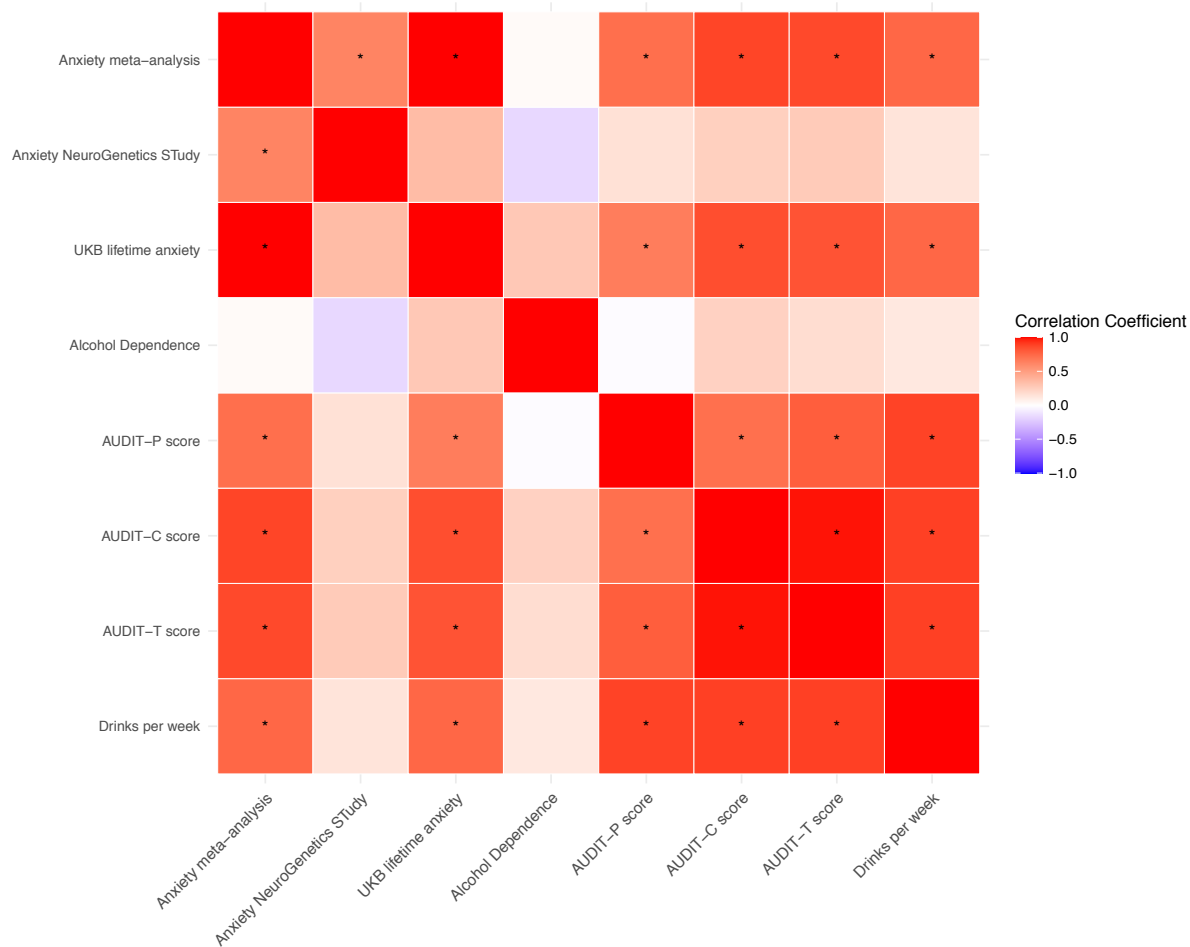

**Figure S18:** Estimates of correlation of LDSC regression coefficients from the cell type- and tissue-specific analysis. Asterisks indicated regression coefficient correlation estimates that pass the FDR < 5% cutoff.



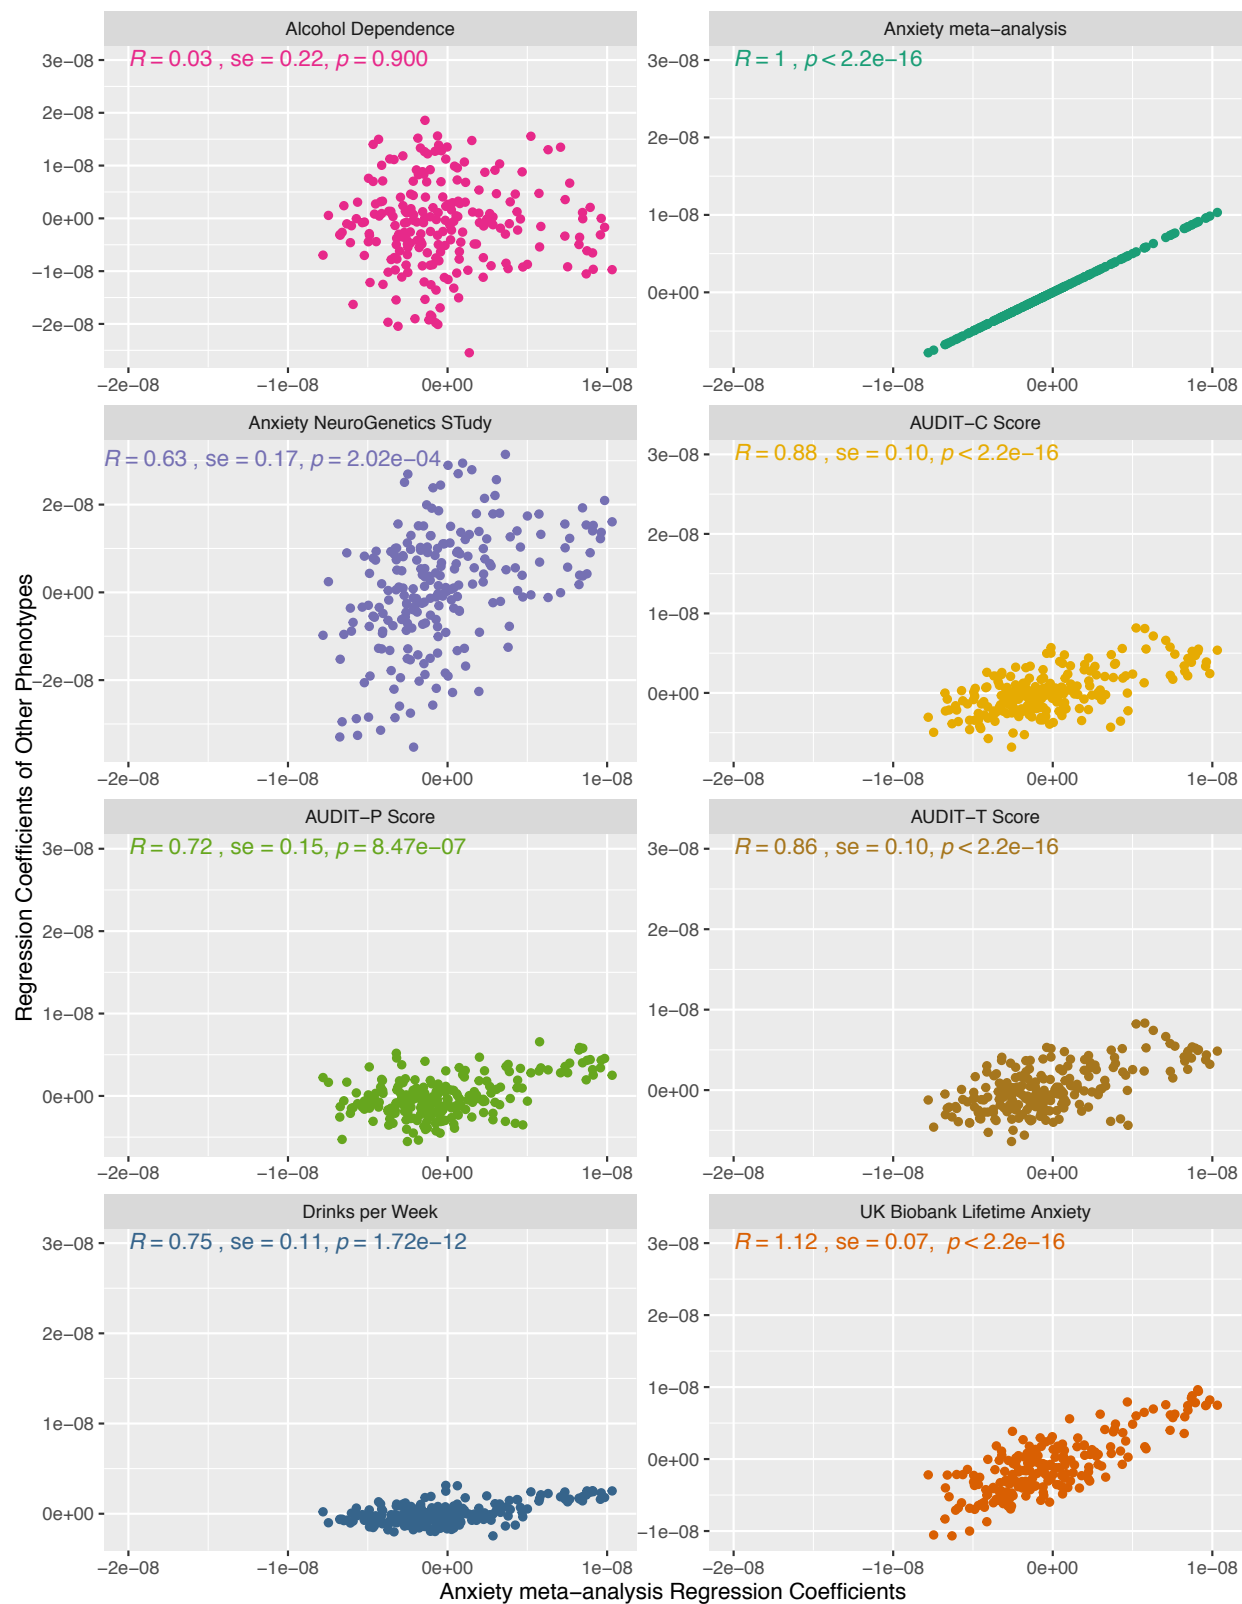

**Figure S19 (a):** Cell type- and tissue-specific regression coefficients correlation between anxiety meta-analysis and other phenotypes.

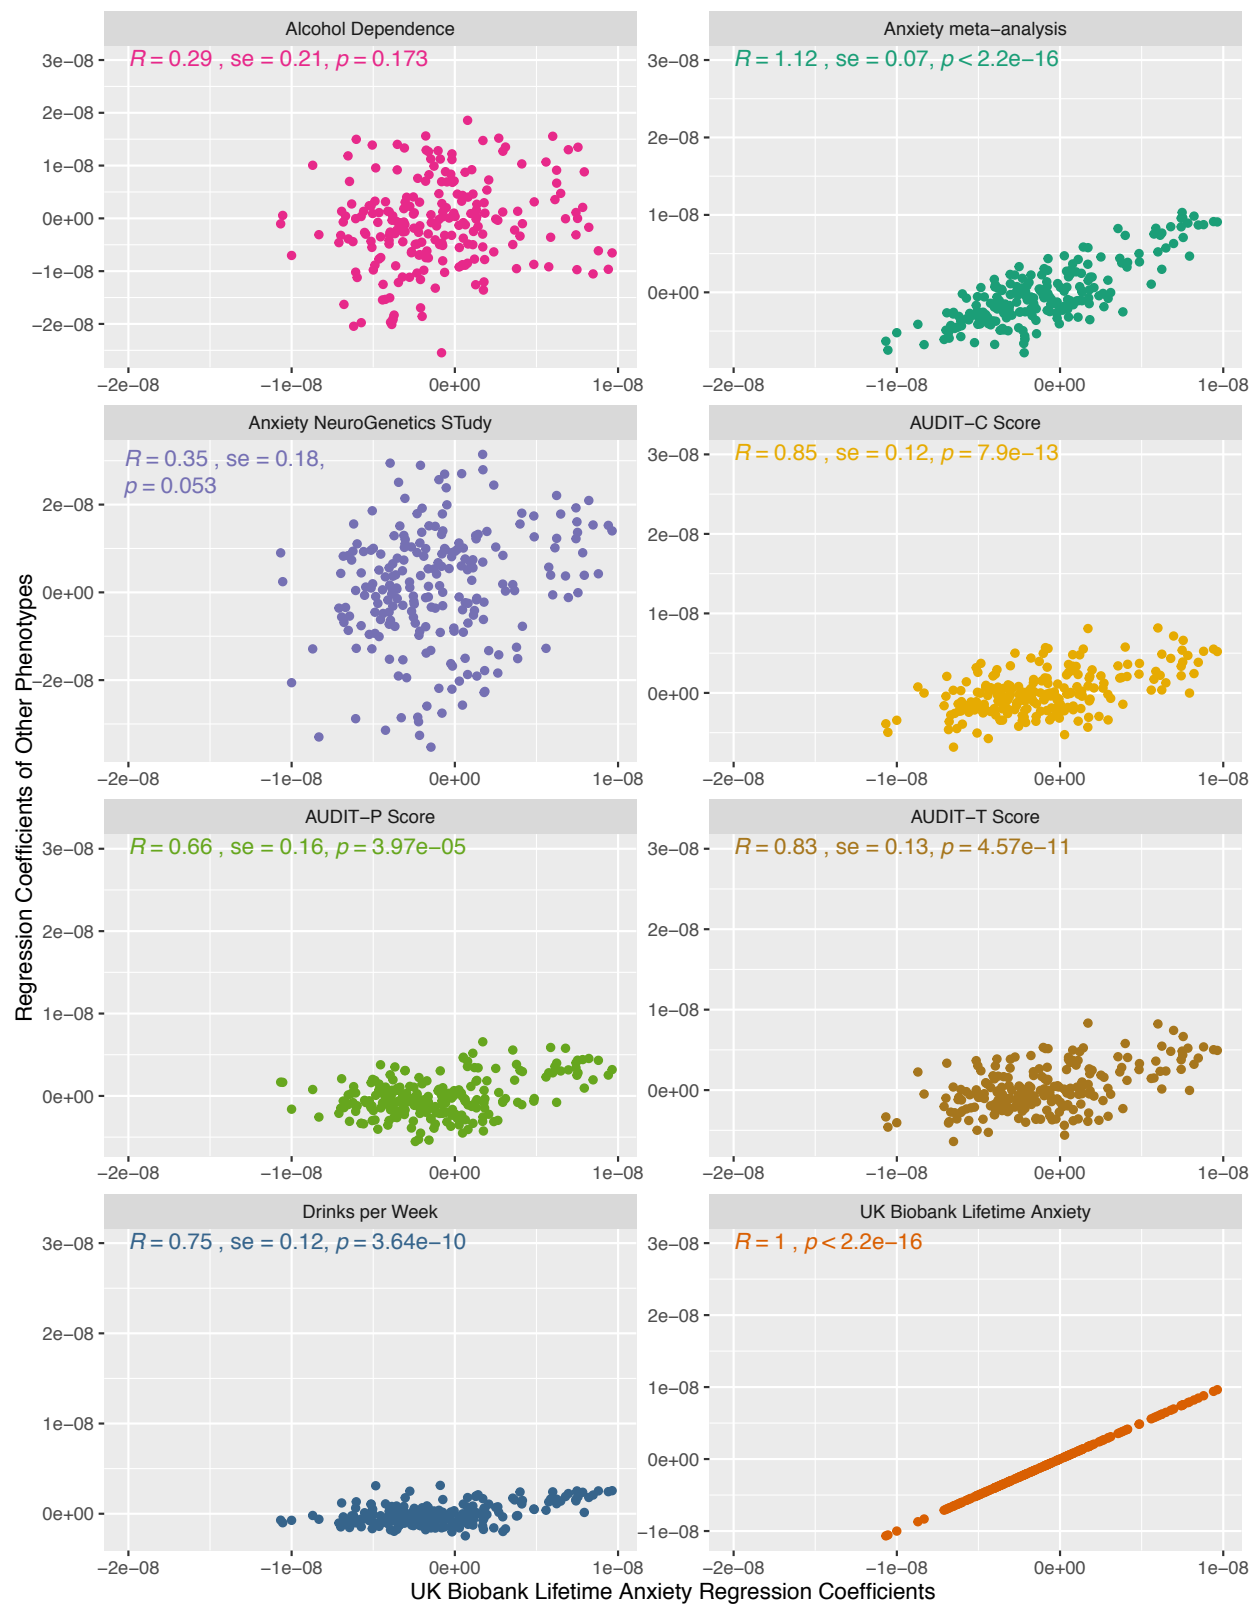

**Figure S19 (b):** Cell type- and tissue-specific regression coefficients correlation between UK Biobank lifetime anxiety and other phenotypes.

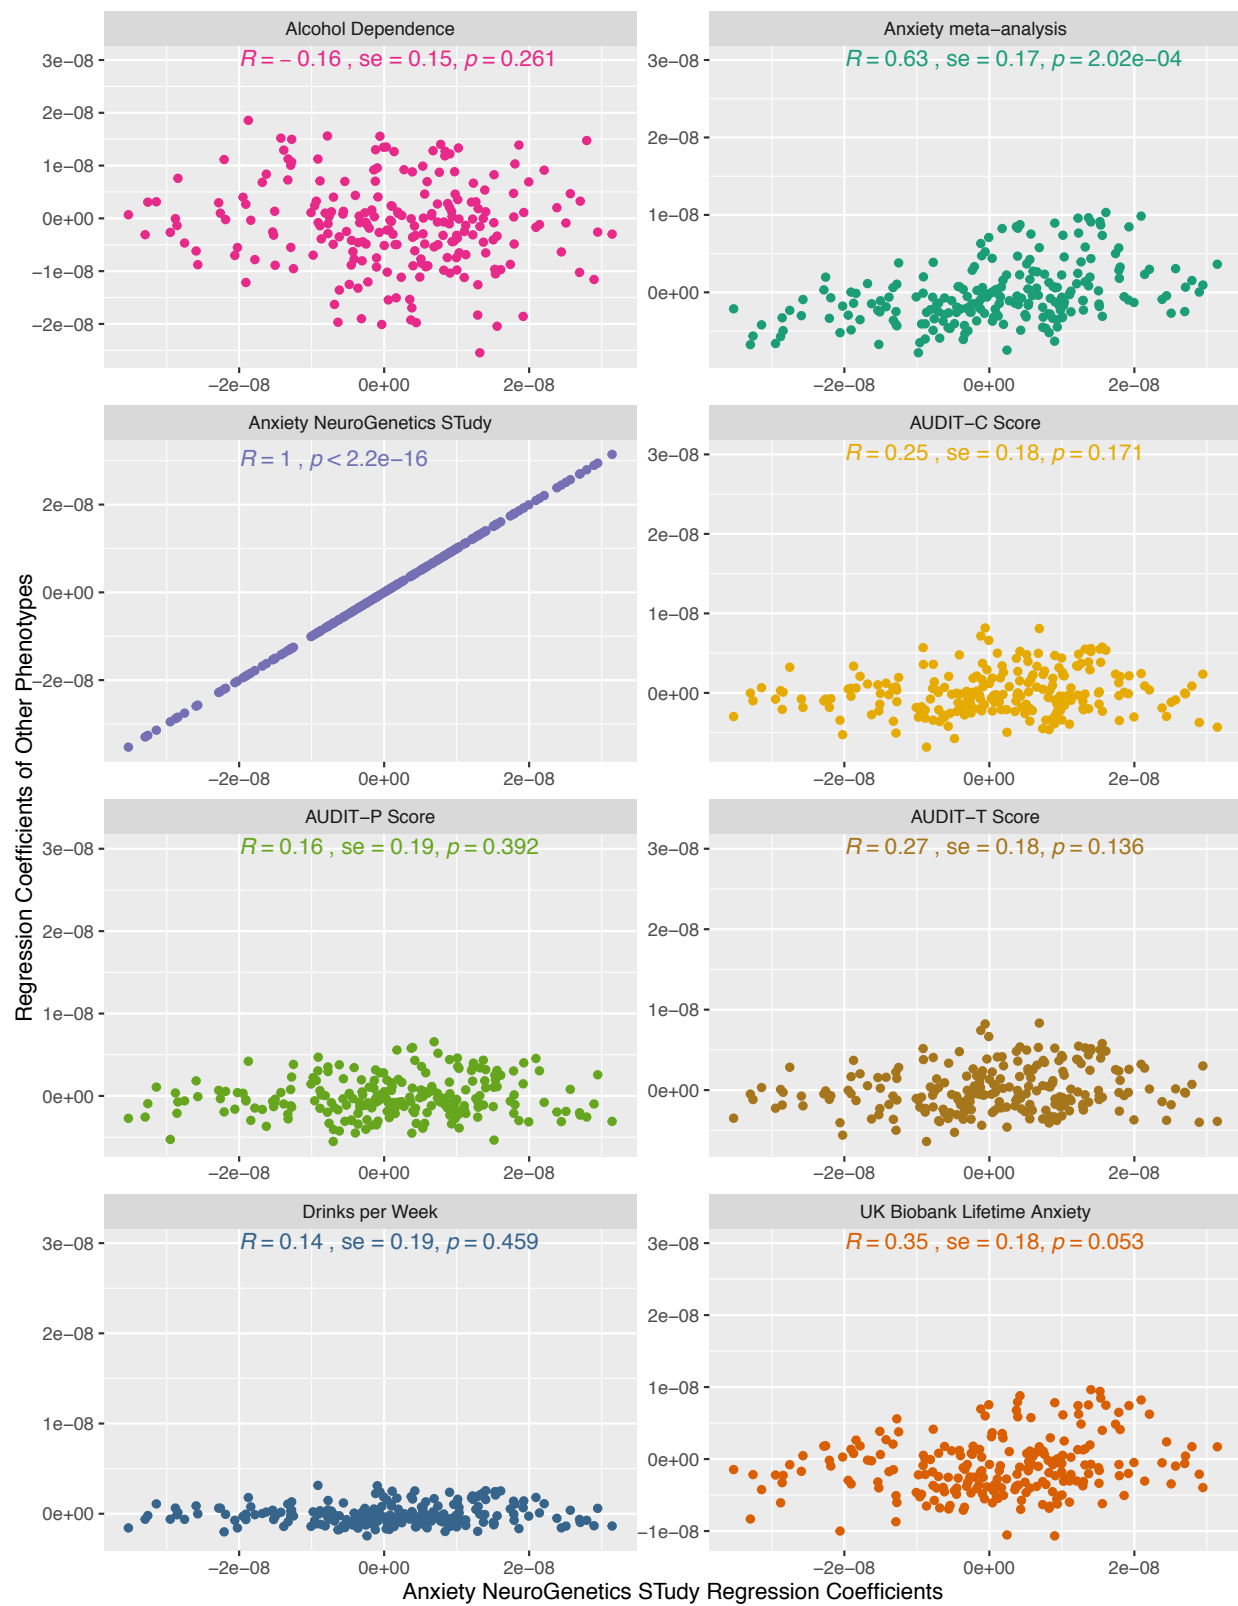

**Figure S19 (c):** Cell type- and tissue-specific regression coefficients correlation between ANGST and other phenotypes.

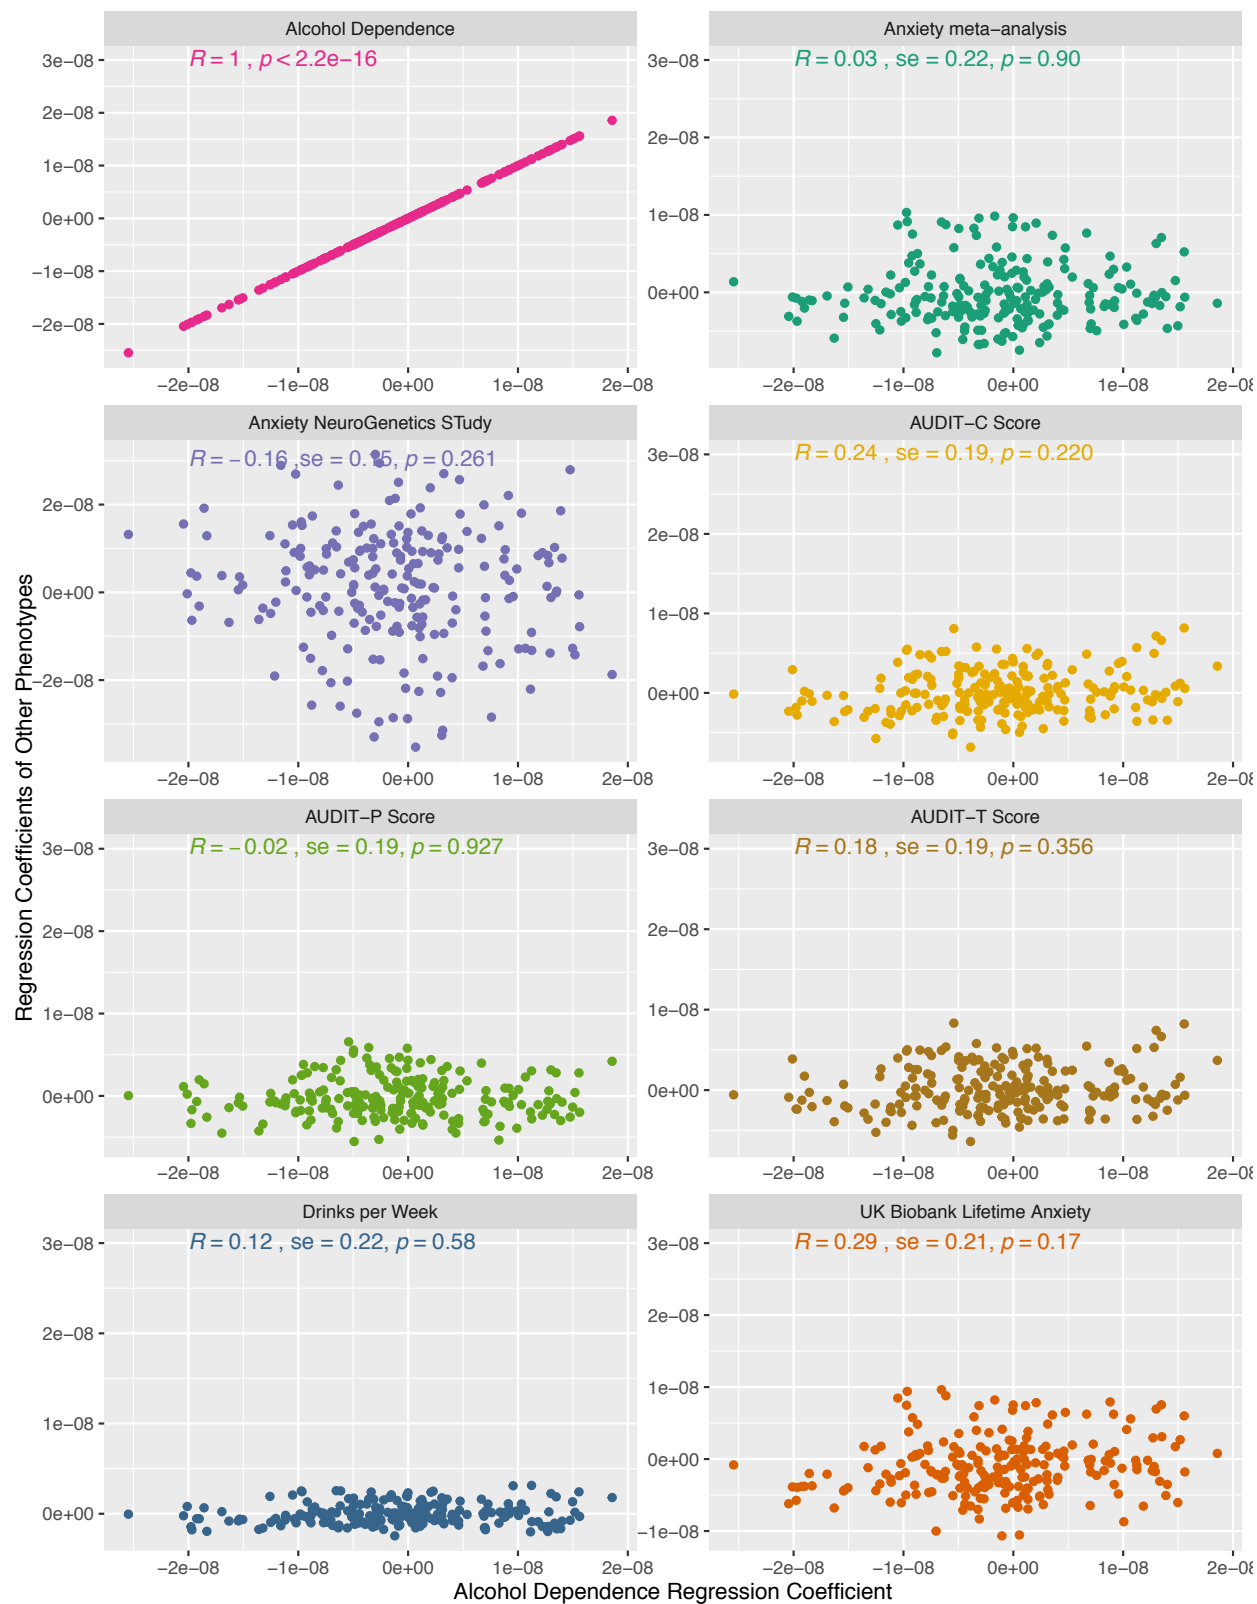

**Figure S19 (d):** Cell type- and tissue-specific regression coefficients correlation between alcohol dependence and other phenotypes.

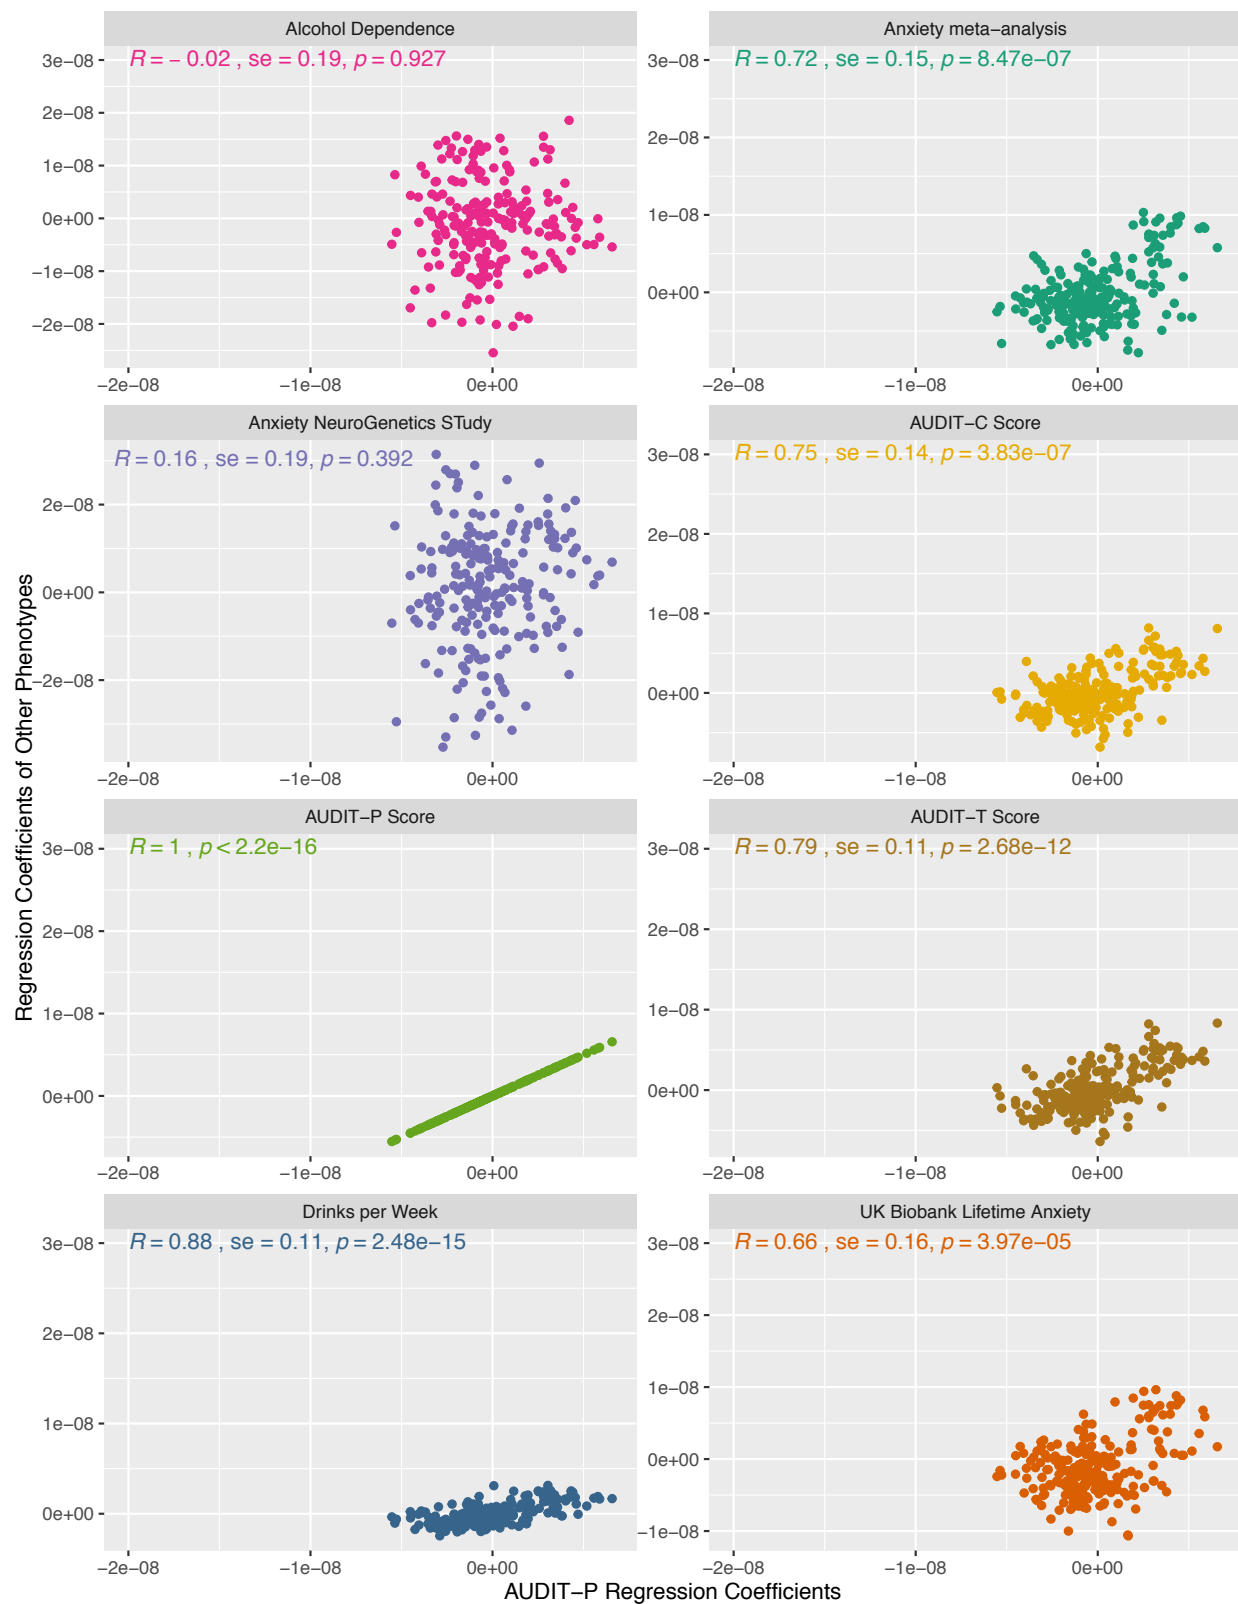

**Figure S19 (e):** Cell type- and tissue-specific regression coefficients correlation between AUDIT-P and other phenotypes.

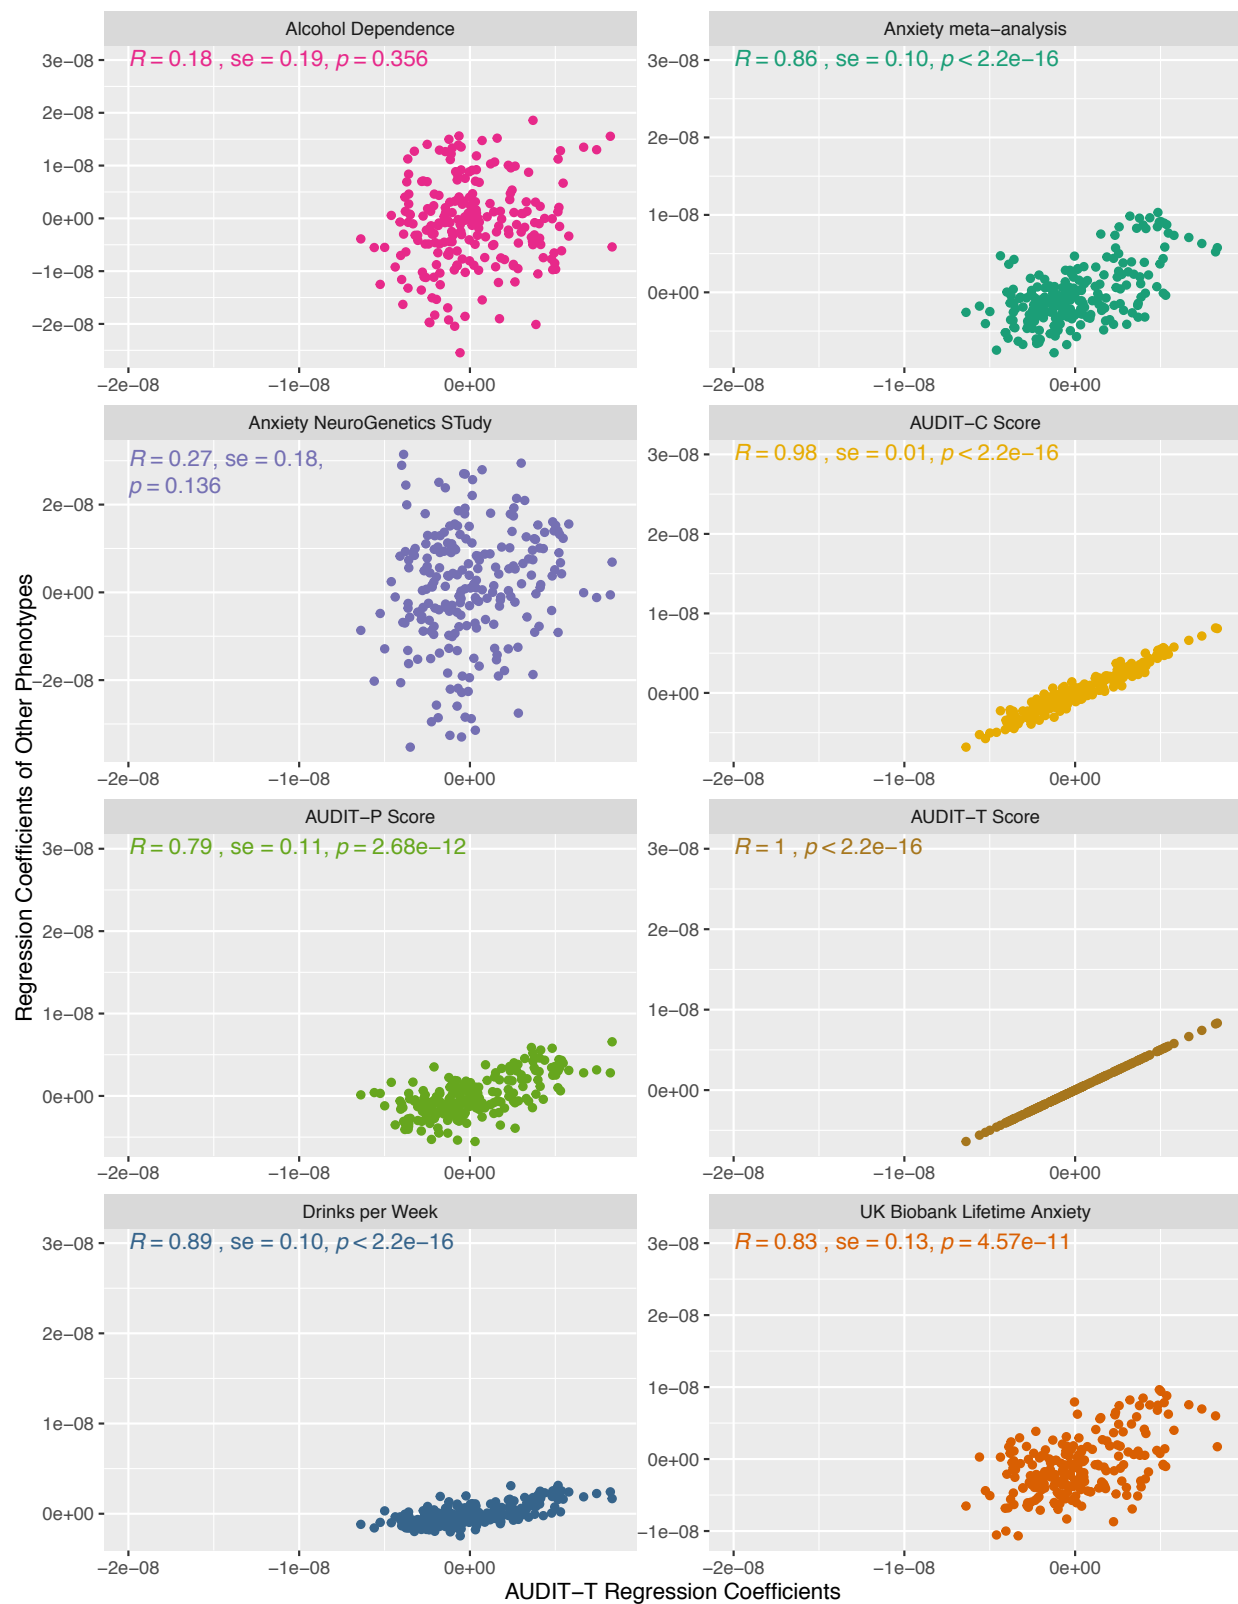

**Figure S19 (f):** Cell type- and tissue-specific regression coefficients correlation between AUDIT-T and other phenotypes.

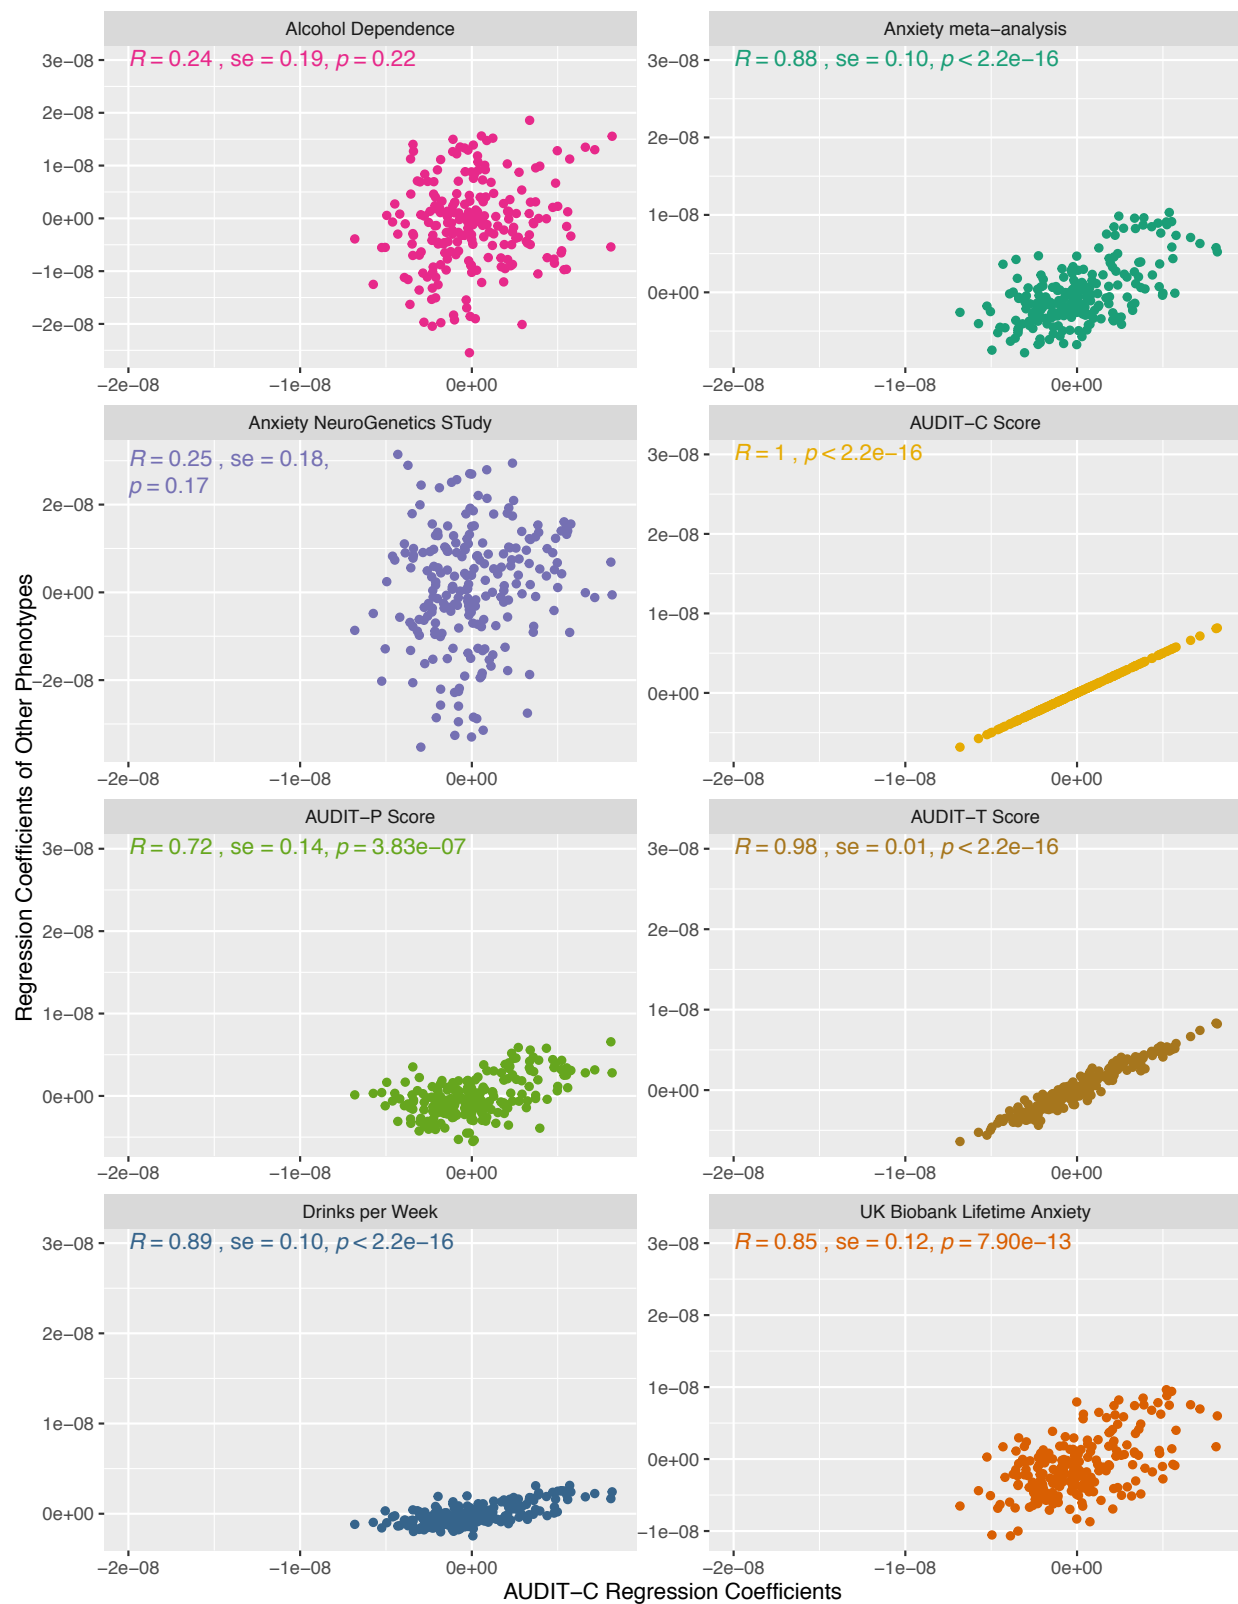

**Figure S19 (g):** Cell type- and tissue-specific regression coefficients correlation between AUDIT-C and other phenotypes.

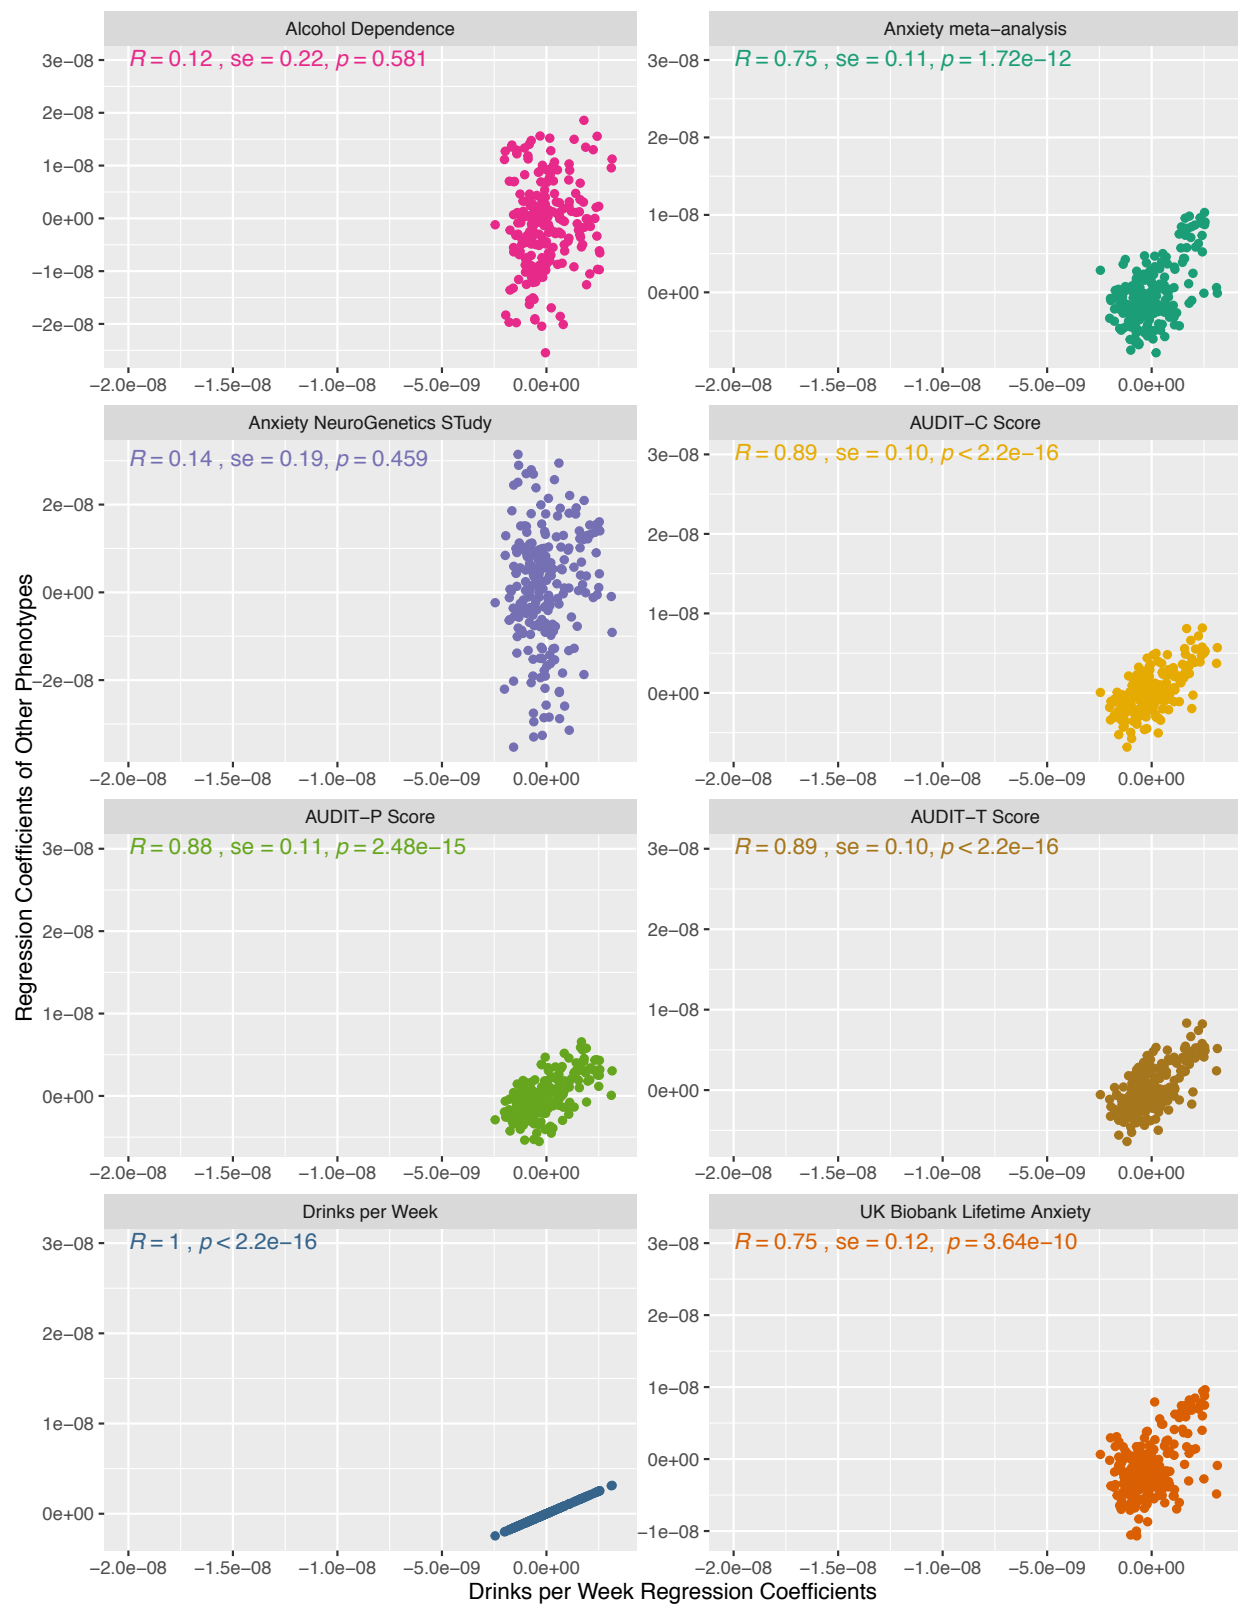

**Figure S19 (h):** Cell type- and tissue-specific regression coefficients correlation between drinks per week and other phenotypes.
